# Supplementary material for: GALLO: An R package for genomic annotation and integration of multiple data sources in livestock for positional candidate loci
Source: PubMed Central journal article supplement (PMC7772745; doi:10.1093/gigascience/giaa149), 2020-12-30
Supplement: giaa149_giga-d-20-00265_original_submission.pdf [file giaa149_giga-d-20-00265_original_submission.pdf]

# GigaScience

## GALLO: An R package for Genomic Annotation and integration of multiple data source in livestock for positional candidate LOci --Manuscript Draft--

|                                                      |                                                                                                                                                                                                                                                                                                                                                                                                                                                                                                                                                                                                                                                                                                                                                                                                                                                                                                                                                                                                                                                                                                                                                                                                                                                                                                      |                   |
|------------------------------------------------------|------------------------------------------------------------------------------------------------------------------------------------------------------------------------------------------------------------------------------------------------------------------------------------------------------------------------------------------------------------------------------------------------------------------------------------------------------------------------------------------------------------------------------------------------------------------------------------------------------------------------------------------------------------------------------------------------------------------------------------------------------------------------------------------------------------------------------------------------------------------------------------------------------------------------------------------------------------------------------------------------------------------------------------------------------------------------------------------------------------------------------------------------------------------------------------------------------------------------------------------------------------------------------------------------------|-------------------|
| <b>Manuscript Number:</b>                            | GIGA-D-20-00265                                                                                                                                                                                                                                                                                                                                                                                                                                                                                                                                                                                                                                                                                                                                                                                                                                                                                                                                                                                                                                                                                                                                                                                                                                                                                      |                   |
| <b>Full Title:</b>                                   | GALLO: An R package for Genomic Annotation and integration of multiple data source in livestock for positional candidate LOci                                                                                                                                                                                                                                                                                                                                                                                                                                                                                                                                                                                                                                                                                                                                                                                                                                                                                                                                                                                                                                                                                                                                                                        |                   |
| <b>Article Type:</b>                                 | Technical Note                                                                                                                                                                                                                                                                                                                                                                                                                                                                                                                                                                                                                                                                                                                                                                                                                                                                                                                                                                                                                                                                                                                                                                                                                                                                                       |                   |
| <b>Funding Information:</b>                          | Sustainable Beef and Forage Science Cluster funded by the Canadian Beef Cattle Check-Off, Beef Cattle Research Council, Alberta Beef Producers, Alberta Cattle Feeders' Association, Beef Farmers of Ontario, La Fédération des Producteurs de bovins du Québec, and Agriculture and Agri-Food Canada's Canadian Agricultural Partnership (FDE.13.17)                                                                                                                                                                                                                                                                                                                                                                                                                                                                                                                                                                                                                                                                                                                                                                                                                                                                                                                                                | Dr Angela Cánovas |
| <b>Abstract:</b>                                     | <p>The development of high-throughput sequencing and genotyping methodologies and precision livestock farming allowed the identification of thousands of genomic regions associated with several complex traits. The integration of multiple sources of biological information is a crucial step to better understand patterns regulating the development of complex traits. Genomic Annotation in Livestock for positional candidate LOci (GALLO) is an R package, for the accurate annotation of genes and quantitative trait loci (QTLs) located in regions identified in the most common genomic analyses performed in livestock, such as Genome-Wide Association Studies and transcriptomics using RNA-Sequencing. Moreover, GALLO allows the graphical visualization of gene and QTL annotation results, data comparison among different grouping factors (e.g., methods, breeds, tissues, statistical models, studies, etc.), and QTL enrichment in different livestock species including cattle, pigs, sheep, chicken, etc. Consequently, GALLO is a useful package for annotation, identification of hidden patterns across datasets, datamining of previous reported associations, as well as the efficient scrutinization of the genetic architecture of complex traits in livestock.</p> |                   |
| <b>Corresponding Author:</b>                         | Pablo Augusto de Souza Fonseca<br>University of Guelph<br>Guelph, ON CANADA                                                                                                                                                                                                                                                                                                                                                                                                                                                                                                                                                                                                                                                                                                                                                                                                                                                                                                                                                                                                                                                                                                                                                                                                                          |                   |
| <b>Corresponding Author Secondary Information:</b>   |                                                                                                                                                                                                                                                                                                                                                                                                                                                                                                                                                                                                                                                                                                                                                                                                                                                                                                                                                                                                                                                                                                                                                                                                                                                                                                      |                   |
| <b>Corresponding Author's Institution:</b>           | University of Guelph                                                                                                                                                                                                                                                                                                                                                                                                                                                                                                                                                                                                                                                                                                                                                                                                                                                                                                                                                                                                                                                                                                                                                                                                                                                                                 |                   |
| <b>Corresponding Author's Secondary Institution:</b> |                                                                                                                                                                                                                                                                                                                                                                                                                                                                                                                                                                                                                                                                                                                                                                                                                                                                                                                                                                                                                                                                                                                                                                                                                                                                                                      |                   |
| <b>First Author:</b>                                 | Pablo Augusto de Souza Fonseca                                                                                                                                                                                                                                                                                                                                                                                                                                                                                                                                                                                                                                                                                                                                                                                                                                                                                                                                                                                                                                                                                                                                                                                                                                                                       |                   |
| <b>First Author Secondary Information:</b>           |                                                                                                                                                                                                                                                                                                                                                                                                                                                                                                                                                                                                                                                                                                                                                                                                                                                                                                                                                                                                                                                                                                                                                                                                                                                                                                      |                   |
| <b>Order of Authors:</b>                             | Pablo Augusto de Souza Fonseca                                                                                                                                                                                                                                                                                                                                                                                                                                                                                                                                                                                                                                                                                                                                                                                                                                                                                                                                                                                                                                                                                                                                                                                                                                                                       |                   |
|                                                      | Aroa Suárez-Vega                                                                                                                                                                                                                                                                                                                                                                                                                                                                                                                                                                                                                                                                                                                                                                                                                                                                                                                                                                                                                                                                                                                                                                                                                                                                                     |                   |
|                                                      | Gabiele Marras                                                                                                                                                                                                                                                                                                                                                                                                                                                                                                                                                                                                                                                                                                                                                                                                                                                                                                                                                                                                                                                                                                                                                                                                                                                                                       |                   |
|                                                      | Angela Cánovas                                                                                                                                                                                                                                                                                                                                                                                                                                                                                                                                                                                                                                                                                                                                                                                                                                                                                                                                                                                                                                                                                                                                                                                                                                                                                       |                   |
| <b>Order of Authors Secondary Information:</b>       |                                                                                                                                                                                                                                                                                                                                                                                                                                                                                                                                                                                                                                                                                                                                                                                                                                                                                                                                                                                                                                                                                                                                                                                                                                                                                                      |                   |
| <b>Additional Information:</b>                       |                                                                                                                                                                                                                                                                                                                                                                                                                                                                                                                                                                                                                                                                                                                                                                                                                                                                                                                                                                                                                                                                                                                                                                                                                                                                                                      |                   |
| <b>Question</b>                                      | <b>Response</b>                                                                                                                                                                                                                                                                                                                                                                                                                                                                                                                                                                                                                                                                                                                                                                                                                                                                                                                                                                                                                                                                                                                                                                                                                                                                                      |                   |
| Are you submitting this manuscript to a              | No                                                                                                                                                                                                                                                                                                                                                                                                                                                                                                                                                                                                                                                                                                                                                                                                                                                                                                                                                                                                                                                                                                                                                                                                                                                                                                   |                   |

|                                                                                                                                                                                                                                                                                                                                                                                                                                                                                                                                                         |     |
|---------------------------------------------------------------------------------------------------------------------------------------------------------------------------------------------------------------------------------------------------------------------------------------------------------------------------------------------------------------------------------------------------------------------------------------------------------------------------------------------------------------------------------------------------------|-----|
| special series or article collection?                                                                                                                                                                                                                                                                                                                                                                                                                                                                                                                   |     |
| <p><b>Experimental design and statistics</b></p> <p>Full details of the experimental design and statistical methods used should be given in the Methods section, as detailed in our <a href="#">Minimum Standards Reporting Checklist</a>. Information essential to interpreting the data presented should be made available in the figure legends.</p> <p>Have you included all the information requested in your manuscript?</p>                                                                                                                      | Yes |
| <p><b>Resources</b></p> <p>A description of all resources used, including antibodies, cell lines, animals and software tools, with enough information to allow them to be uniquely identified, should be included in the Methods section. Authors are strongly encouraged to cite <a href="#">Research Resource Identifiers</a> (RRIDs) for antibodies, model organisms and tools, where possible.</p> <p>Have you included the information requested as detailed in our <a href="#">Minimum Standards Reporting Checklist</a>?</p>                     | Yes |
| <p><b>Availability of data and materials</b></p> <p>All datasets and code on which the conclusions of the paper rely must be either included in your submission or deposited in <a href="#">publicly available repositories</a> (where available and ethically appropriate), referencing such data using a unique identifier in the references and in the “Availability of Data and Materials” section of your manuscript.</p> <p>Have you have met the above requirement as detailed in our <a href="#">Minimum Standards Reporting Checklist</a>?</p> | Yes |

|  |  |
|--|--|
|  |  |
|--|--|

1 **GALLO: An R package for Genomic Annotation and integration of multiple**  
2 **data source in livestock for positional candidate LOci**

3 Pablo A.S. Fonseca<sup>1\*</sup>, Aroa Suárez-Vega<sup>1</sup>, Gabriele Marras<sup>1,2</sup>, and Ángela Cánovas<sup>1\*</sup>

4 <sup>1</sup>University of Guelph, Department of Animal Biosciences, Centre for Genetic Improvement of  
5 Livestock, Guelph, N1G 2W1, Ontario, Canada.

6 <sup>2</sup>The Semex Alliance, Guelph N1G 3Z2, Ontario, Canada

7 Contact:

8 PASF: pfonseca@uoguelph.ca

9 ASV: asuarezv@uoguelph.ca

10 GM: gmarras@uoguelph.ca

11 AC: acanovas@uoguelph.ca

12 \* Corresponding author

13

14 **Abstract**

15 The development of high-throughput sequencing and genotyping methodologies and precision  
16 livestock farming allowed the identification of thousands of genomic regions associated with  
17 several complex traits. The integration of multiple sources of biological information is a crucial  
18 step to better understand patterns regulating the development of complex traits. Genomic  
19 Annotation in Livestock for positional candidate LOci (GALLO) is an R package, for the accurate  
20 annotation of genes and quantitative trait loci (QTLs) located in regions identified in the most  
21 common genomic analyses performed in livestock, such as Genome-Wide Association Studies and  
22 transcriptomics using RNA-Sequencing. Moreover, GALLO allows the graphical visualization of  
23 gene and QTL annotation results, data comparison among different grouping factors (e.g.,  
24 methods, breeds, tissues, statistical models, studies, etc.), and QTL enrichment in different  
25 livestock species including cattle, pigs, sheep, chicken, etc. Consequently, GALLO is a useful  
26 package for annotation, identification of hidden patterns across datasets, datamining of previous  
27 reported associations, as well as the efficient scrutinization of the genetic architecture of complex  
28 traits in livestock.

29 **Keywords:** Multi-omics integration; QTL annotation; Gene annotation; Datamining; QTL  
30 enrichment analysis; Livestock

31

32

33

34

## 35 **Background**

36 The identification of quantitative trait loci (QTLs), genomic regions linked to complex traits  
37 through association tests using genetic markers and phenotypic traits, is a crucial step in the  
38 improvement of genomic selection and economic profitability in livestock [1–4]. Additionally, in  
39 the last decades, the development of precision livestock farming strategies resulted in the  
40 possibility to obtain a huge volume and diversity of phenotypic data [5–7]. The development of  
41 high-throughput methodologies (e.g., Genome-Wide Association Studies, Transcriptomics,  
42 Metabolomics, Proteomics, etc.) for the study of the genetic architecture of complex traits allows  
43 the identification of potential candidate genes associated with economically relevant traits in  
44 livestock. Taken together, these new technologies can substantially improve the accuracy of  
45 detection of candidate regions associated with economical important traits across the genome in  
46 livestock species [8]. Consequently, the number of QTLs identified across the genome in livestock  
47 species increased substantially in the last years. Currently, in the Animal QTLdb it is possible to  
48 retrieve information about QTLs previously identified in cattle (127,191), chicken (11,340), horse  
49 (2,260), pig (29,865), rainbow trout (584) and sheep (3,001) [9]. The proper integration of the  
50 results obtained from different methodologies and technologies available is a crucial step for the  
51 accurate identification of the biological processes regulating the development of complex traits as  
52 well as the identification of potential functional candidate genes for each trait or shared among  
53 traits [8,10–12]. The integration of both structural and functional data can help to scrutinize the  
54 genetic architecture of economically relevant traits, consequently, helping to better understand  
55 complex biological patterns regulating the expression of these traits, such as pleiotropic effect,  
56 epistasis and genetic hitchhiking, among others.

57 In spite of the great potential to improve the identification of functional candidate genes and/or  
58 QTLs through the integration of multiple data sources, currently this process is not very  
59 straightforward due to limitations in the pipelines and algorithms implemented in the tools  
60 available for livestock. Currently, there are several tools that implement functions for gene (i.e.,  
61 Biomart and BEDTools) and QTL annotation (Animal QTLdb) [9,13,14]. However, these tools  
62 have limitations regarding the automatization process to analyze results from multiple candidate  
63 regions (Biomart web application and the R package and Animal QTLdb) or for the visualization  
64 of the results. Moreover, although the automatization is possible, the direct link between the  
65 candidate regions and/or markers with the annotated genes and QTLs is missed. Consequently,  
66 this gap is forcing the user to back solve the overlap between the input and output files in order to  
67 perform the proper association between the candidate region and/or markers and the annotated  
68 genes and/or positional co-localized QTLs. In addition, nowadays there is still a gap for  
69 customized QTL enrichment analyses in the available software and databases. The Genomic  
70 functional Annotation in Livestock for positional candidate LOci (GALLO) is an R package  
71 designed to provide an automatized and a straightforward environment for gene and QTL  
72 annotation in multiple candidate regions, as well as data integration from multiple data sources.  
73 The QTL enrichment analyses can additionally be performed directly by GALLO using the output  
74 obtained from the QTL annotation step. In addition, GALLO also provides a set of functions for  
75 graphical visualization of the annotation, comparison, integration and QTL enrichment results. In  
76 this context, the GALLO package was developed as an alternative tool: 1) to allow the integration  
77 and the simultaneous annotation of multiple datasets for genes and QTLs; 2) to provide graphical  
78 visualization tools to integrate visually the annotation and the similarity against the datasets; 3) to

79 perform QTL enrichment analysis for the positional candidate genomic regions and/or markers  
80 associated with economically relevant traits in livestock.

## 81 **Implementation**

82 The GALLO package was wrote in the R language [15]. The stable release is available as an R  
83 package on CRAN (<https://cran.r-project.org/web/packages/GALLO/index.html>). The code was  
84 extensively tested with several datasets from different sources and methodologies and reviewed to  
85 ensure the package quality standards. Additionally, the vignettes were created to be comprehensive  
86 and to present practical examples in order to provide a user-friendly and an easier understanding  
87 and usability for the user.

88 The GALLO package provides a useful set of functions that allows the user a straightforward data  
89 integration, comparison, gene and QTL annotation, and visualization of several data sources and  
90 methodologies, such as data from genome-wide association study (GWAS), RNA-Sequencing,  
91 whole-genome sequencing, etc. (Figure 1 and Table 1). The main advantage to perform an  
92 automated analysis from multiple datasets results in the flexibility to handle the output using  
93 different subsets (traits, populations, models, etc.) in the same environment, without generating  
94 multiple intermediate output files.

## 95 **Methods**

### 96 *Case study – Candidate regions for scrotal circumference and fertility in cattle*

97 The dataset used to present the basic usage and advantages of GALLO package is composed by  
98 the markers significantly associated with scrotal circumference in Canchim breed [16] and  
99 uncompensable fertility in Holstein cattle [17]. These two studies were previously analyzed



100 together in a systematic review regarding male fertility in cattle [11]. Therefore, the data used  
101 herein comprises a multi-study and multi-breed analysis. These candidate markers (527 single  
102 nucleotide polymorphisms (SNPs)) are available on Supplementary Table 1. In addition to the  
103 candidate markers, we present as Supplementary Files 1 and 2, the annotation gff file containing  
104 the QTL database information for cattle (obtained from the Animal QTLdb;  
105 [https://www.animalgenome.org/cgi-bin/QTLdb/BT/download?file=gffUMD\\_3.1](https://www.animalgenome.org/cgi-bin/QTLdb/BT/download?file=gffUMD_3.1)) and the gtf file  
106 containing the genes annotated in the cattle genome obtained from Ensembl  
107 ([ftp://ftp.ensembl.org/pub/release-94/gtf/bos\\_taurus/](ftp://ftp.ensembl.org/pub/release-94/gtf/bos_taurus/)). The genomic coordinates of both files were  
108 based on the bovine reference genome version UMD 3.1 due to the original coordinates used to  
109 report the location of the candidate markers in the original studies. Here, the analysis performed  
110 follows the same logical order to the one presented in the GALLO vignette  
111 ([https://rpubs.com/pablo\\_bio/GALLO\\_vignette](https://rpubs.com/pablo_bio/GALLO_vignette)). However, the dataset used in the user practical  
112 tutorial is a subset of the data presented here, aiming to reduce computational demand for the users.  
113 The script with all the commands used to perform the analysis present here are available in  
114 Supplementary File 3. All the tests were performed using a desktop with a processor Intel Core i5  
115 2.4 GHz with 8 Gb of RAM memory.

### 116 *Importing datasets and annotating genes and QTLs around candidate markers*

117 The first step in the pipeline consists in importing the databases which will be used for the analyses  
118 with the *import\_gff\_gtf()* function. In our specific example, we imported both, cattle gene  
119 annotation (gtf) and QTL (gff) databases. The *import\_gff\_gtf()* function receives as arguments the  
120 database file (db\_file) and the file type (file\_type= gff or gtf) and creates a dataframe with the  
121 respective information from each file. The system time demanded to import the gtf and gff files  
122 were 0.045 and 0.311 seconds, respectively, indicating an efficient importing process. The file

123 containing the candidate markers can be imported using any available function in the R  
124 environment such as *read.table()* and *read.csv()*.

125 The main function of GALLO, *find\_genes\_qtls\_around\_markers()*, is responsible to perform the  
126 annotation of genes and/or co-localized QTLs within or nearby candidate markers or genomic  
127 regions (using a user's defined interval/window). This function uses the information provided in  
128 the .gtf file (for gene annotation) or .gff (for QTL annotation) to retrieve the requested information.  
129 The output combines the information available in the input file provided by the user with the  
130 information available for the genes and QTLs mapped in the candidate genomic regions.  
131 Consequently, for example, for an input file composed of three genomic coordinates where 4 genes  
132 are annotated in each of the intervals determined by the user, the output file of  
133 *find\_genes\_qtls\_around\_markers()* will contain 12 rows. The minimum information necessary  
134 for the gene and QTL annotation procedures is a data frame with two columns with the  
135 chromosome (CHR) and position in base pairs (BP) in the case of candidate SNPs input. In the  
136 case of candidate haplotypes, windows, copy number variations (CNVs) or candidate regions; the  
137 input file is composed by three columns corresponding to the chromosome (CHR), the start  
138 position in base pairs (BP1) and the end position in base pairs (BP2). Data examples for the  
139 candidate markers and windows input files can be obtained using the *data(QTLmarkers)* and  
140 *data(QTLwindows)* commands in R. Additionally, examples of QTL and gene annotation results  
141 are accessible through the commands *data(gtfGenes)* and *data(gffQTLs)* commands, respectively.  
142 These outputs can be easily handled by summary functions in R, such as *table()*, to obtain  
143 information such as the total number of genes and QTLs, the number of genes and QTLs annotated  
144 per variants, etc. The performance of GALLO package in terms of efficiency is similar to other  
145 currently packages and software which allow a similar annotation of candidate genomic loci. In

146 this sense, the gene annotation process was compared with the *getBM()* function from the biomaRt  
147 package. The gene annotation process on GALLO needed 0.424 seconds to completely annotate  
148 the genes in a 200 Kb interval (upstream and downstream) from candidate markers, while the  
149 biomaRt function required 0.019 seconds. The QTL annotation on GALLO was compared with  
150 the Bedtools `-wao -C` command, resulting in 0.851 and 0.12 seconds required for each approach,  
151 respectively. It is important to highlight that for both gene and QTL annotation using biomaRt and  
152 bedtools, respectively, a posterior processing of the output file is required in order to match the  
153 candidate markers and the genes and QTLs mapped within the candidate intervals. On the order  
154 hand, the output file from *find\_genes\_qtls\_around\_markers()* function was designed to allow this  
155 match in an intuitive way, combining the rows of both candidate markers file and database files  
156 (gff and gtf). Additionally, GALLO allows the user to perform both annotations for genes and  
157 QTLs with a single software and programming language. Consequently, GALLO obtains a more  
158 elaborate and informative output with compromise the computational demand for the analysis. The  
159 output files obtained in the gene and QTL annotation are available on Supplementary Tables 2 and  
160 3, respectively.

161 *Comparing and visualizing the overlapping of genes and QTLs annotated within the candidate*  
162 *regions*

163 The output file generated by the *find\_genes\_qtls\_around\_markers()* function can be used as an  
164 input file for the other set of GALLO functions. An advantage from the output of  
165 *find\_genes\_qtls\_around\_markers()* function is any additional information present in the input file  
166 will be retained in the output file. Consequently, this information can be used compare the retrieved  
167 information between groups of population, methodologies, statistical models, etc. For example,  
168 the functions *overlapping\_among\_groups()* and *plot\_overlapping()* can be used to create matrices

169 with the overlapping values among groups and to visualize this overlapping. The Figure 2 shows  
170 the results of gene and QTL overlapping between the positional markers obtained in the two studies  
171 selected for the dataset of markers analyzed, Feugang et al. (2009) [17] and Buzanskas et al. (2017)  
172 [16]. It is important to highlight that these overlapping matrices are not symmetrical. The  
173 percentage of genes from study A shared with the study B, and vice-versa, are calculated in  
174 function of the total number of genes in A or B, respectively. In the current example, it is possible  
175 to note that only a small percentage of the positional candidate genes were shared between the  
176 studies. However, the analysis of QTL (using the trait name as reference ID) overlapping indicated  
177 a higher similarity between the studies, 46% of the all the QTLs annotated in the candidate regions  
178 from Feugang et al. (2010) [17] were also present in Buzanskas et al. (2017) [16] and 93% of the  
179 QTLs annotated in the candidate regions from Buzanskas et al. (2017) were also present in  
180 Feugang et al. (2010) [16,17]. These results may suggest that even with a small proportion of  
181 shared genes, the candidate regions of both studies are frequently associated with similar  
182 processes. Similar roles played by the positional candidate genes in those regions in related  
183 biological process would be one of the reasons of the observed result.

#### 184 *Understanding the QTL context of the candidate regions*

185 A more precise investigation of the QTL representativeness and diversity can help to better  
186 understand the genomic context of the candidate regions. The recurrent association of particular  
187 genomic regions with multiple traits might suggest the presence of complex genetic mechanisms  
188 regulating that region, such as pleiotropy, epistasis, hitchhiking effect, among others [18,19]. The  
189 *plot\_qtl\_info()* function from GALLO allows the graphical visualization of the summary of QTL  
190 types and traits annotated. The percentage of each QTL type annotated within the candidate regions  
191 is presented in a pie plot through the use of the argument `qtl_plot="qtl_type"`, while the percentage

192 of each trait associated with a specific QTL type can be plotted setting the argument  
193 `qtl_plot="qtl_name"` and informing the additional argument `qtl_class` (that must receive the name  
194 of the QTL class to be plotted). Figure 3 shows that for Feugang et al. (2009) [17] the two most  
195 frequent QTL types were Milk (50.42%) and Reproduction (16.97%), while for Buzanskas et al.  
196 (2017) [16] the most frequent QTL types were Reproduction (87.06%) and Meat and Carcass  
197 (5.03%). An in depth analyses can be performed for each QTL type in order to observe the  
198 frequency of each trait associated with a specific QTL type. The most frequent traits related with  
199 Reproduction QTLs were calving ease (>3%) and scrotal circumference (>60%) for Feugang et al.  
200 (2009) and Buzanskas et al. (2017) [16,17], respectively (Figure 3). The comparison between the  
201 frequency of traits related with Reproduction QTLs annotated in Feugang et al. (2009) and  
202 Buzanskas et al. (2017) [16,17] indicated that among the top 10 more frequent QTLs, calving ease,  
203 inhibin levels, stillbirth, interval to first estrus after calving, and birth index were shared between  
204 the studies. The combined analysis (not filtering by study) indicated that the Reproduction and  
205 Milk QTL types were the two most frequent classes with 76.99% and 10.62% of all QTL types,  
206 respectively. In addition, scrotal circumference, inhibin level and calving easy were the most  
207 frequent Reproduction QTL related traits in the combined analysis.

### 208 *QTL enrichment analysis*

209 In some cases, the biases produced by a greater research into certain areas/traits of higher relevance  
210 to animal production (such as milk production related traits in the QTL database for cattle) may  
211 result in a larger proportion of records for these traits in the QTL database. Consequently, the  
212 simple investigation of the proportion of each QTL type might not be totally useful. The GALLO  
213 package allows the user to perform a QTL enrichment analysis to test the significance of the QTL  
214 representativeness. The QTL enrichment analysis function on GALLO package is based in a

215 hypergeometric test approach, where the number of QTLs annotated within the candidate regions,  
216 for each QTL type or trait, is compared with the observed number of QTLs in the reference  
217 database. The *qtl\_enrich()* function allow the user to perform the QTL enrichment analysis for  
218 both QTL types and traits (*qtl\_type*= “QTL\_type” or “Name”), for the whole genome or  
219 chromosome-wise (*enrich\_type*= “genome” or “chromosome”) and for all the annotated  
220 chromosomes or a subset (*chr.subset*= NULL or the object with the subset of chromosomes). The  
221 use of chromosome-wise enrichment analysis might help to detect specific regions across the  
222 genome with high number of QTLs for some specific trait, i.e. BTA14 in cattle for milk production  
223 [20]. A total of 161 unique pairs of traits and chromosomes were tested for the enrichment using  
224 the annotated QTLs for both studies. The system time required to perform the enrichment analysis  
225 was 5.32 seconds, suggesting efficient processing. The top 10 enriched QTLs (False Discovery  
226 Rate (FDR) < 0.05) for the combined analysis are shown in Table 2 and the enrichment results for  
227 all the annotated QTLs are shown in Supplementary Table 4. Additionally, GALLO also allows  
228 the user to obtain a graphical visualization, in a bubble plot, of the enrichment results using the  
229 *QTLenrich\_plot()* function. This function received as arguments the enriched table obtained from  
230 *qtl\_enrich()*, the name of a column with the traits names to be plotted and the name of a column  
231 with the p-values to be plotted. A total of 28 pairs of traits and chromosomes were found enriched  
232 in the combined analysis, with scrotal circumference (BTA 5, 18, 9, and 21), milk glycosylated  
233 kappa-casein percentage (BTA 6 and 16), inhibin level (BTA 5), triglyceride level (BTA 5), milk  
234 kappa-casein percentage (BTA 6) and milk iron content (BTA 23) in the list of top 10 most  
235 enriched traits (Figure 4).

236 *Relationship between studies and enriched QTLs*

237 An interesting functionality of GALLO is the graphical visualization of the relationship between  
238 groups using a chord plot. The *relationship\_plot()* function receives as argument a dataframe (it  
239 can use the gene or QTL annotation results, the QTL enrichment, or any other table with two  
240 groups of information to be compared), the two groups to be compared (arguments x and y) and  
241 the set graphical arguments or set the size, color and gap between the sector in the chord plot. The  
242 Figure 5 shows the chord plot obtained using a subset of the QTL annotation dataframe composed  
243 only by the top 10 enriched traits and the studies which these traits were annotated. This plot  
244 indicated that only inhibin levels and scrotal circumference on BTA5 are shared between Feugang  
245 et al. (2009) and Buzanskas et al. (2017) [16,17]. Additionally, milk glycosylated kappa-casein  
246 percentage (BTA 6 and 16), milk kappa-casein percentage (BTA 6) and milk iron content (BTA  
247 23) were annotated only in Feugang et al. (2009) [17] and scrotal circumference (BTA 9, 18, 21)  
248 and triglyceride level (BTA 5) were annotated only in Buzanskas et al. (2017) [16]. Inhibin is  
249 produced by the Sertoli cells and can be used as a biomarker for sexual development [21]. In  
250 addition, the inhibin levels were already associated with both scrotal circumference and sperm  
251 quality traits in several studies, suggesting an important role in male fertility [22–26]. The results  
252 obtained here through the integration of the GWAS results from two independent studies followed  
253 by QTL annotation reinforce this association. Additionally, QTLs not associated with  
254 Reproduction phenotypes were identified in the enrichment analysis, suggesting the presence of  
255 complex such as pleiotropic effect, epistasis and genetic hitchhiking effect. Previous studies  
256 already highlight the possible role of genomic regions with this kind of processes in the cattle  
257 genome [27,28]. An additional integration of the QTL annotation and enrichment analysis  
258 performed here with the gene annotation and prospection for functional candidate genes can be a

259 powerful tool to better understand the genetic architecture and the relationship among complex  
260 traits.

## 261 **Discussion**

262 The GALLO package is composed of a group of functions designed to perform an efficient and  
263 direct downstream analysis for the gene and QTL annotation for candidate markers/SNPs,  
264 haplotypes, genomic windows, runs of homozygosity, CNVs, etc. The functions implemented in  
265 GALLO were designed in order to allow the integration of multiple datasets simultaneously. A  
266 brief summary of these functions is shown in Table 1. For example, GWAS results from multiple  
267 traits and/or populations or breeds can be analyzed together and compared or individually analyzed  
268 in the downstream analysis. This can be easily performed by adding an extra column in the input  
269 file with the grouping factors to classify each dataset. These input files can be easily adapted from  
270 the output of the most common used software to analyze high-throughput genomic data, such as  
271 PLINK, BLUPF90, DESeq2, etc. [29–31]. In addition, GALLO provides a set of functions  
272 designed for the visualization of the annotation results, overlapping among groups, relationship  
273 between groups (i.e., markers and candidate genes, datasets and QTLs, models and positional  
274 candidate genes, etc.), and QTL enrichment results. This set of functions provides the user the  
275 capability to integrate several results from multiple sources including different methodologies  
276 (GWAS, RNA-sequencing, proteomics, etc.), populations (breeds, time-points, etc.), traits or the  
277 different combination of these groups or others.

278 A summary of usage examples and output descriptions, for all the functions available on GALLO  
279 can be find in the reference manual (Supplementary File 4). It is important to highlight that the  
280 two studies used as an example here are also part of the bovine QTL database present in the Animal



281 QTLdb. Consequently, the results obtained here for annotation and enrichment would be expected,  
282 once the candidate regions are necessarily present in the annotation database. This approach was  
283 used as proof of concept of the methodology and indicates a precise annotation of the candidate  
284 regions.

## 285 **Conclusion**

286 The integration of multiple datasets for gene and QTL annotation is one of the major bottlenecks  
287 for the automatization of functional analysis of the results obtained using high-throughput  
288 methodologies. The GALLO package provides a user-friendly and straightforward environment to  
289 perform gene and QTL annotation, visualization, data comparison and QTL enrichment for  
290 functional studies in livestock species. Consequently, the use of GALLO in the analysis of data  
291 generated from high-throughput methodologies may improve the identification of hidden patterns  
292 across datasets, datamining of previous reported associations, as well as the efficiency in the  
293 scrutinization of the genetic architecture of complex traits in livestock.

## 294 **Availability and requirements**

295 Project name: Genomic Annotation in Livestock for positional candidate LOci (GALLO)

296 Project home page: <https://github.com/pablobio/GALLO>

297 Operating system(s): Platform independent

298 Programming language: R

299 Other requirements: Depends: R ( $\geq 3.5.0$ )

300 License: GPL-3

301

302

303 **Availability of supporting data**

304 All the data analyzed in the present study can be accessed in the public repository hosting the R  
305 package (<https://github.com/pablobio/GALLO>). The input files and results used as examples in the  
306 manuscript preparation are available in the supplementary Tables 1-4. A manual including usage  
307 examples and output descriptions, for all the functions available on GALLO can be find in the  
308 reference manual (Supplementary File 4).

309 **Declarations**

310 *List of abbreviations*

311 BP: position in base pairs; BP1: start position in base pairs; BP2: end position in base pairs; CHR:  
312 Chromosome; CNV: Copy Number Variation; GALLO: Genomic Annotation in Livestock for  
313 positional candidate Loci; GWAS: Genome-Wide Association Study; QTL: Quantitative trait loci;  
314 SNP: Single Nucleotide Polymorphism.

315 *Ethics approval and consent to participate*

316 Not applicable.

317 *Consent for publication*

318 Not applicable.

319 *Competing interests*

320 The authors declare that they have no competing interests.

321

322

323 *Funding*

324 This study (FDE.13.17) was supported by the Sustainable Beef and Forage Science Cluster funded  
325 by the Canadian Beef Cattle Check-Off, Beef Cattle Research Council, Alberta Beef Producers,  
326 Alberta Cattle Feeders' Association, Beef Farmers of Ontario, La Fédération des Producteurs de  
327 bovins du Québec, and Agriculture and Agri-Food Canada's Canadian Agricultural Partnership.  
328 The funders had no role in study design, data collection and analysis, decision to publish, or  
329 preparation of the manuscript.

330 *Authors' contributions*

331 PASF, ASV and AC were responsible for the conceptualization, data processing and review of the  
332 codes. PASF and ASV were responsible for data curation. PASF and GM were responsible to  
333 implement the bioinformatic pipeline, integrate datasets, and the coding. AC was responsible for  
334 funding acquisition.

335 *Acknowledgements*

336 Not applicable.

337 **References**

- 338 1. Ron M, Weller JI. From QTL to QTN identification in livestock - Winning by points rather  
339 than knock-out: A review. *Anim. Genet.* 2007.
- 340 2. Ernst CW, Steibel JP. Molecular advances in QTL discovery and application in pig breeding.  
341 *Trends Genet.* 2013.

- 342 3. Miglior F, Fleming A, Malchiodi F, Brito LF, Martin P, Baes CF. A 100-Year Review:  
343 Identification and genetic selection of economically important traits in dairy cattle. *J Dairy Sci.*  
344 2017;
- 345 4. Pértille F, Guerrero-Bosagna C, Silva VH Da, Boschiero C, Nunes JDRDS, Ledur MC, et al.  
346 High-throughput and Cost-effective Chicken Genotyping Using Next-Generation Sequencing.  
347 *Sci Rep.* 2016;
- 348 5. Berckmans D. General introduction to precision livestock farming. *Anim Front.* 2017;
- 349 6. Halachmi I, Guarino M. Editorial: Precision livestock farming: A “per animal” approach using  
350 advanced monitoring technologies. *Animal.* 2016;
- 351 7. Banhazi TM, Lehr H, Black JL, Crabtree H, Schofield P, Tscharke M, et al. Precision  
352 Livestock Farming: An international review of scientific and commercial aspects. *Int J Agric*  
353 *Biol Eng.* 2012;5:1–9.
- 354 8. Cánovas A, Reverter A, DeAtley KL, Ashley RL, Colgrave ML, Fortes MRS, et al. Multi-  
355 tissue omics analyses reveal molecular regulatory networks for puberty in composite beef cattle.  
356 *PLoS One.* 2014;
- 357 9. Hu ZL, Park CA, Reecy JM. Building a livestock genetic and genomic information  
358 knowledgebase through integrative developments of Animal QTLdb and CorrDB. *Nucleic Acids*  
359 *Res.* 2019;
- 360 10. De Souza Fonseca PA, Id-Lahoucine S, Reverter A, Medrano JF, Fortes MS, Casellas J, et al.  
361 Combining multi-OMICs information to identify key-regulator genes for pleiotropic effect on  
362 fertility and production traits in beef cattle. *PLoS One.* 2018;13:1–22.
- 363 11. Fonseca PA de S, dos Santos FC, Lam S, Suárez-Vega A, Miglior F, Schenkel FS, et al.  
364 Genetic mechanisms underlying spermatic and testicular traits within and among cattle breeds:  
365 Systematic review and prioritization of GWAS results. *J Anim Sci.* 2018;
- 366 12. Suárez-Vega A, Gutiérrez-Gil B, Benavides J, Perez V, Tosser-Klopp G, Klopp C, et al.  
367 Combining GWAS and RNA-Seq approaches for detection of the causal mutation for hereditary

368 junctional epidermolysis bullosa in sheep. *PLoS One*. 2015;

369 13. Durinck S, Moreau Y, Kasprzyk A, Davis S, De Moor B, Brazma A, et al. BioMart and  
370 Bioconductor: A powerful link between biological databases and microarray data analysis.  
371 *Bioinformatics*. 2005;

372 14. Quinlan AR, Hall IM. BEDTools: A flexible suite of utilities for comparing genomic  
373 features. *Bioinformatics*. 2010;

374 15. R Core Team (2019). R: A language and environment for statistical computing. Accessed 1st  
375 April 2019. 2019;

376 16. Buzanskas ME, Grossi D do A, Ventura RV, Schenkel FS, Chud TCS, Stafuzza NB, et al.  
377 Candidate genes for male and female reproductive traits in Canchim beef cattle. *J Anim Sci*  
378 *Biotechnol*. 2017;

379 17. Feugang JM, Kaya A, Page GP, Chen L, Mehta T, Hirani K, et al. Two-stage genome-wide  
380 association study identifies integrin beta 5 as having potential role in bull fertility. *BMC*  
381 *Genomics*. 2009;

382 18. Hackinger S, Zeggini E. Statistical methods to detect pleiotropy in human complex traits.  
383 *Open Biol*. 2017.

384 19. Id-Lahoucine S, Molina A, Cánovas A, Casellas J. Screening for epistatic selection  
385 signatures: A simulation study. *Sci Rep*. 2019;

386 20. Kühn C, Thaller G, Winter A, Bininda-Emonds ORP, Kaupe B, Erhardt G, et al. Evidence  
387 for multiple alleles at the DGAT1 locus better explains a quantitative trait locus with major  
388 effect on milk fat content in cattle. *Genetics*. 2004;

389 21. Phillips DJ. Activins, inhibins and follistatins in the large domestic species. *Domest. Anim.*  
390 *Endocrinol*. 2005.

391 22. Fortes MRS, Reverter A, Kelly M, Mcculloch R, Lehnert SA. Genome-wide association  
392 study for inhibin, luteinizing hormone, insulin-like growth factor 1, testicular size and semen

393 traits in bovine species. *Andrology*. 2013;

394 23. Fortes MRS, Reverter A, Hawken RJ, Bolormaa S, Lehnert S a. Candidate genes associated  
395 with testicular development, sperm quality, and hormone levels of inhibin, luteinizing hormone,  
396 and insulin-like growth factor 1 in Brahman bulls. *Biol Reprod* [Internet]. 2012 [cited 2013 Sep  
397 6];87:58. Available from: <http://www.ncbi.nlm.nih.gov/pubmed/22811567>

398 24. Bame JH, Dalton JC, Degelos SD, Good TEM, Ireland JLH, Jimenez-Krassel F, et al. Effect  
399 of Long-Term Immunization against Inhibin on Sperm Output in Bulls1. *Biol Reprod*. 1999;

400 25. Martin TL, Williams GL, Lunstra DD, Ireland JJ. Immunoneutralization of Inhibin Modifies  
401 Hormone Secretion and Sperm Production in Bulls1. *Biol Reprod*. 1991;

402 26. Sato T, Kudo T, Ikehara Y, Ogawa H, Hirano T, Kiyohara K, et al. Chondroitin sulfate N-  
403 acetylgalactosaminyltransferase 1 is necessary for normal endochondral ossification and  
404 aggrecan metabolism. *J Biol Chem*. 2011;

405 27. De Souza Fonseca PA, Id-Lahoucine S, Reverter A, Medrano JF, Fortes MS, Casellas J, et al.  
406 Combining multi-OMICs information to identify key-regulator genes for pleiotropic effect on  
407 fertility and production traits in beef cattle. *PLoS One*. 2018;

408 28. Bolormaa S, Pryce JE, Reverter A, Zhang Y, Barendse W, Kemper K, et al. A Multi-Trait,  
409 Meta-analysis for Detecting Pleiotropic Polymorphisms for Stature, Fatness and Reproduction in  
410 Beef Cattle. *PLoS Genet*. 2014;10.

411 29. Love MI, Huber W, Anders S. Moderated estimation of fold change and dispersion for RNA-  
412 seq data with DESeq2. *Genome Biol*. 2014;15:1–21.

413 30. Purcell S, Neale B, Todd-Brown K, Thomas L, Ferreira MAR, Bender D, et al. PLINK: A  
414 tool set for whole-genome association and population-based linkage analyses. *Am J Hum Genet*.  
415 2007;

416 31. Misztal I, Tsuruta S, Strabel T, Auvray B, Druet T, H LD. BLUPF90 and related programs  
417 (BGF90). *Proc 7th world Congr Genet Appl to Livest Prod*. 2002. p. 743–4.

418

419

420 **Tables**

421 Table 1: Description of the functions implemented in the GALLO package.

| Function                       | Description                                                                                                     | Output                                                                                                                                                                                 |
|--------------------------------|-----------------------------------------------------------------------------------------------------------------|----------------------------------------------------------------------------------------------------------------------------------------------------------------------------------------|
| <b>Gene and QTL annotation</b> |                                                                                                                 |                                                                                                                                                                                        |
| import_gff_gtf                 | Import the gff and gtf files used for QTL and gene annotation, respectively                                     | A dataframe composed by the information present in the gtf and gff files                                                                                                               |
| find_genes_qtls_around_markers | Annotation of genes and QTLs around candidate regions                                                           | A data frame composed of the columns present in the input file and the genes or QTLs mapped within or around (if interval provided) the candidate regions                              |
| <b>Data visualization</b>      |                                                                                                                 |                                                                                                                                                                                        |
| overlapping_among_groups       | Overlapping between grouping factors (such as different traits, statistical models, populations, studies, stc.) | A list with three matrices: 1) A matrix with the number of overlapping data; 2) A matrix with the percentage of overlapping; 3) A matrix with the combination of the two previous ones |
| plot_overlapping               | Plot overlapping between data and grouping factors                                                              | A heatmap with the overlapping between groups                                                                                                                                          |
| plot_qtl_info                  | Plot QTLs information from the gene or QTL annotation output                                                    | A pie plot (if QTL class is chosen) or a bar plot (if trait name is chosen) for the annotated QTLs                                                                                     |
| relationship_plot              | Plot the relationship among                                                                                     | A chord plot linking a grouping factor (genomic regions, traits, populations,                                                                                                          |



the candidate regions or grouping factors with the annotated genes and QTLs

etc.) with the annotated genes or QTLs

## QTL enrichment

qtl\_enrich

Performs a QTL enrichment analysis based on a Bootstrap simulation for each QTL class or trait

A data frame composed of the enrichment results for QTL classes or traits present in the input file. 1) QTL: The QTL class or trait used for the enrichment; 2) CHR: The chromosome for that specific QTL or trait (if the option "chromosome" is informed to the argument enrich\_type); 3) N\_QTLs: Number of observed QTLs or traits in the dataset; 4) N\_QTLs\_db: Number of each annotated QTL in the qTL database; 5) Total\_annotated\_QTLs: Total number of annotated QTLs; 6) Total\_QTLs\_db: Total number of QTLs in the QTL database; 7) pvalue: P-value for the enrichment analysis; 8) adj.pval: The adjusted p-value based on the multiple test correction selected by the user; 9) QTL\_type= The QTL type for each annotated trait.

QTLenrich\_plot

Creates a bubble plot with the QTL enrichment results

A plot with the QTL enrichment results

---

422

423

424

425

426

427

428 Table 2: Top 10 enriched QTLs for the combined analysis performed with the candidate regions from the two studies, Feugang et al.  
 429 (2009) and Buzanskas et al. (2017), used in the example dataset.

| QTL                                       | CHR | # QTLs | # QTLs db | Total # QTLs | Total # QTLs db | p-value   | FDR        | QTL type     |
|-------------------------------------------|-----|--------|-----------|--------------|-----------------|-----------|------------|--------------|
| Scrotal circumference                     | 5   | 132    | 134       | 347          | 5942            | 1.56E-171 | 4.98E-169  | Reproduction |
| Scrotal circumference                     | 18  | 11     | 13        | 41           | 2147            | 2.20E-18  | 3.52E-16   | Reproduction |
| Scrotal circumference                     | 9   | 11     | 14        | 30           | 1395            | 2.04E-17  | 2.18E-15   | Reproduction |
| Milk glycosylated kappa-casein percentage | 6   | 71     | 1607      | 204          | 12158           | 1.86E-15  | 1.49E-13   | Milk         |
| Inhibin level                             | 5   | 47     | 285       | 347          | 5942            | 3.38E-11  | 2.16E-09   | Reproduction |
| Scrotal circumference                     | 21  | 4      | 5         | 12           | 3606            | 3.51E-10  | 1.87E-08   | Reproduction |
| Milk kappa-casein percentage              | 6   | 76     | 2637      | 204          | 12158           | 2.39E-07  | 1.01E-05   | Milk         |
| Triglyceride level                        | 5   | 6      | 7         | 347          | 5942            | 2.53E-07  | 1.01E-05   | Health       |
| Milk glycosylated kappa-casein percentage | 16  | 7      | 44        | 21           | 1440            | 1.29E-06  | 4.58E-05   | Milk         |
| Milk iron content                         | 23  | 4      | 8         | 19           | 1159            | 3.48E-06  | 0.00011329 | Milk         |

430

431 **Figure legends:**

432 **Figure 1:** Workflow explaining the main functions implemented on GALLO. The grey rectangles represent  
433 the functions, while the rounded and sharp rectangles represent the main goal of that respective function  
434 and its input, respectively.

435 **Figure 2:** Overlapping between genes (A) and QTLs (B) annotated within the candidate regions  
436 (100 Kb downstream and upstream from the significant markers) from Feugang et al. (2009) and  
437 Buzanskas et al. (2017). The darker the color within the squares, the higher is the percentage of  
438 shared genes or QTLs.

439 **Figure 3:** Percentage of QTL type (pie plot) and trait related to Reproduction QTLs (barplots) for  
440 the QTL annotation results obtained for Feugang et al. (2009) (A), Buzanskas et al. (2017) (B) and  
441 the combined analysis (using both studies) (C).

442 **Figure 4:** Bubble plot displaying the enrichment results for the top 10 enrich QTLs identified  
443 using the QTLs annotated within the candidate regions from Feugang et al. (2009) and Buzanskas  
444 et al. (2017). The darker the red shade in the circles, stronger is the enrichment. The area of the  
445 circles is proportional to the number of QTLs. The x-axis shows a richness factor obtained by the  
446 ratio of number of QTLs annotated in the candidate regions and the total number of each QTL (and  
447 chromosome in the case of this plot) in the reference database.

448 **Figure 5:** Chord plot showing the relationship between the top 10 enriched QTLs (Scrotal  
449 circumference – SCRCIR, Inhibin level – INHIB, Triglyceride level – TRIGLY, Milk glycosylated  
450 kappa-casein percentage – MGKCASP, Milk iron content – MFE, Milk kappa-casein percentage  
451 - MKCASP) and the studies (Feugang et al. (2009) in purple and Buzanskas et al. (2017) in pink).

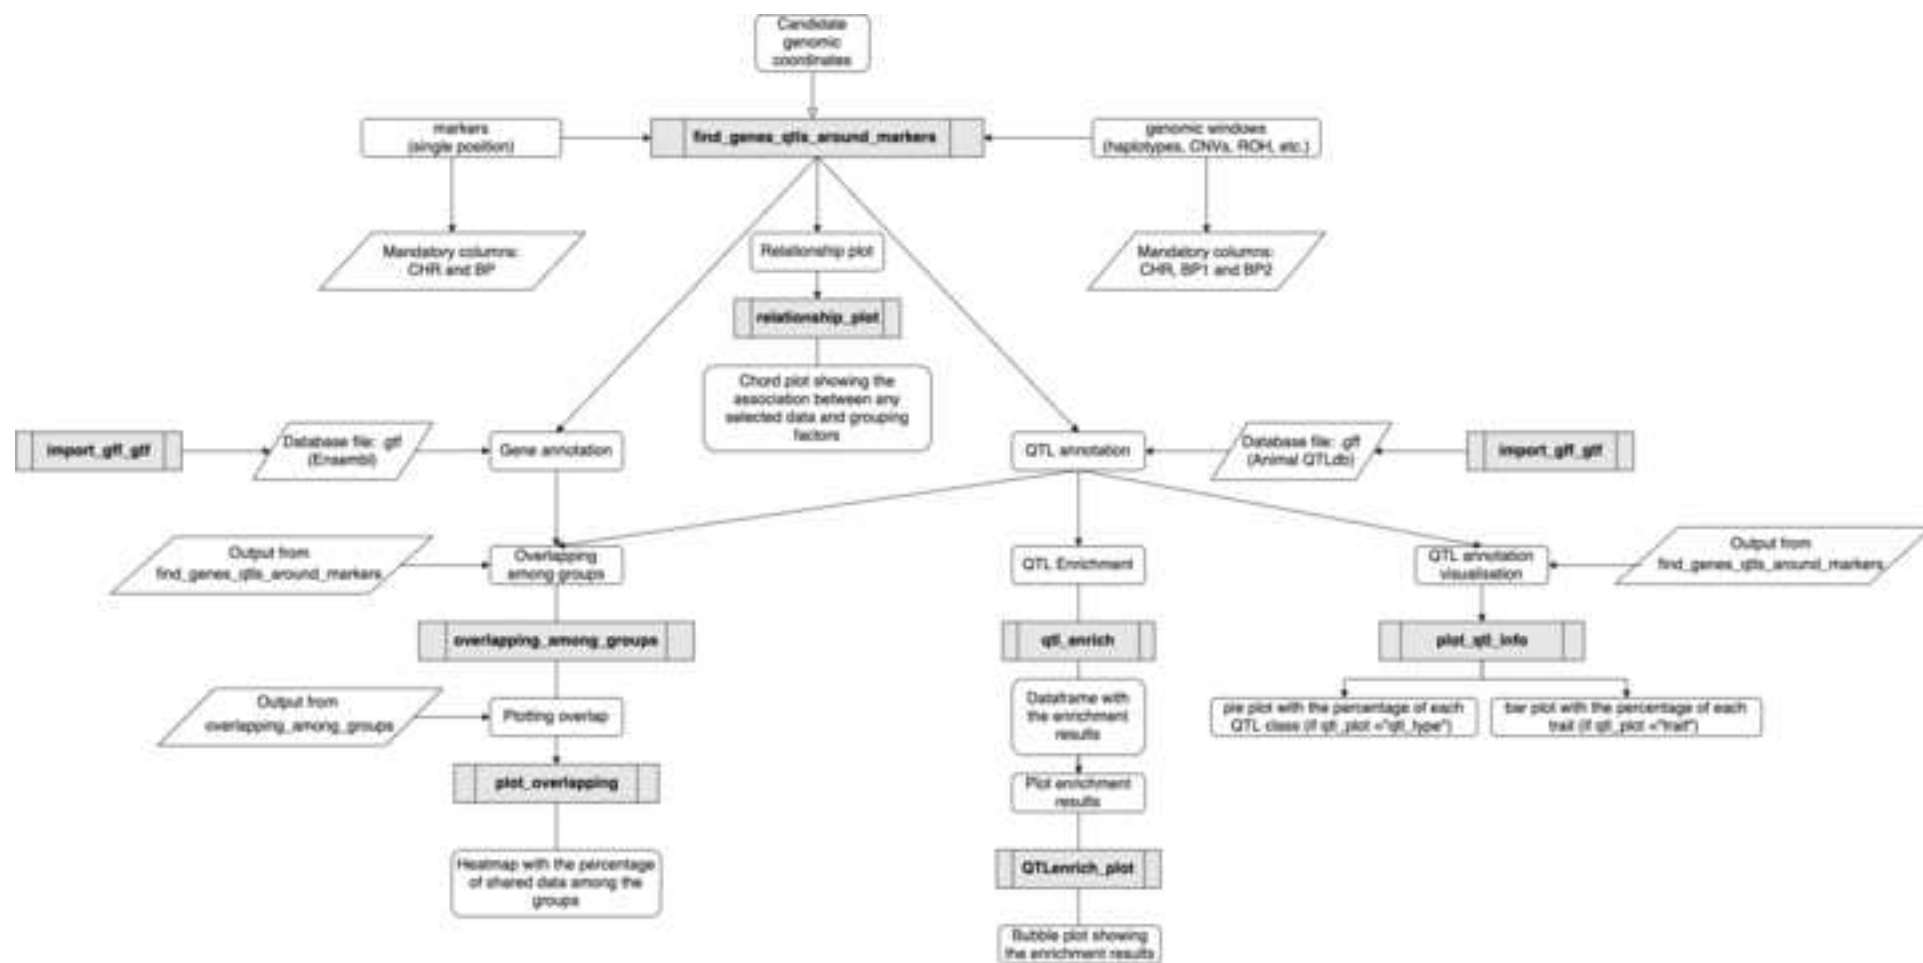

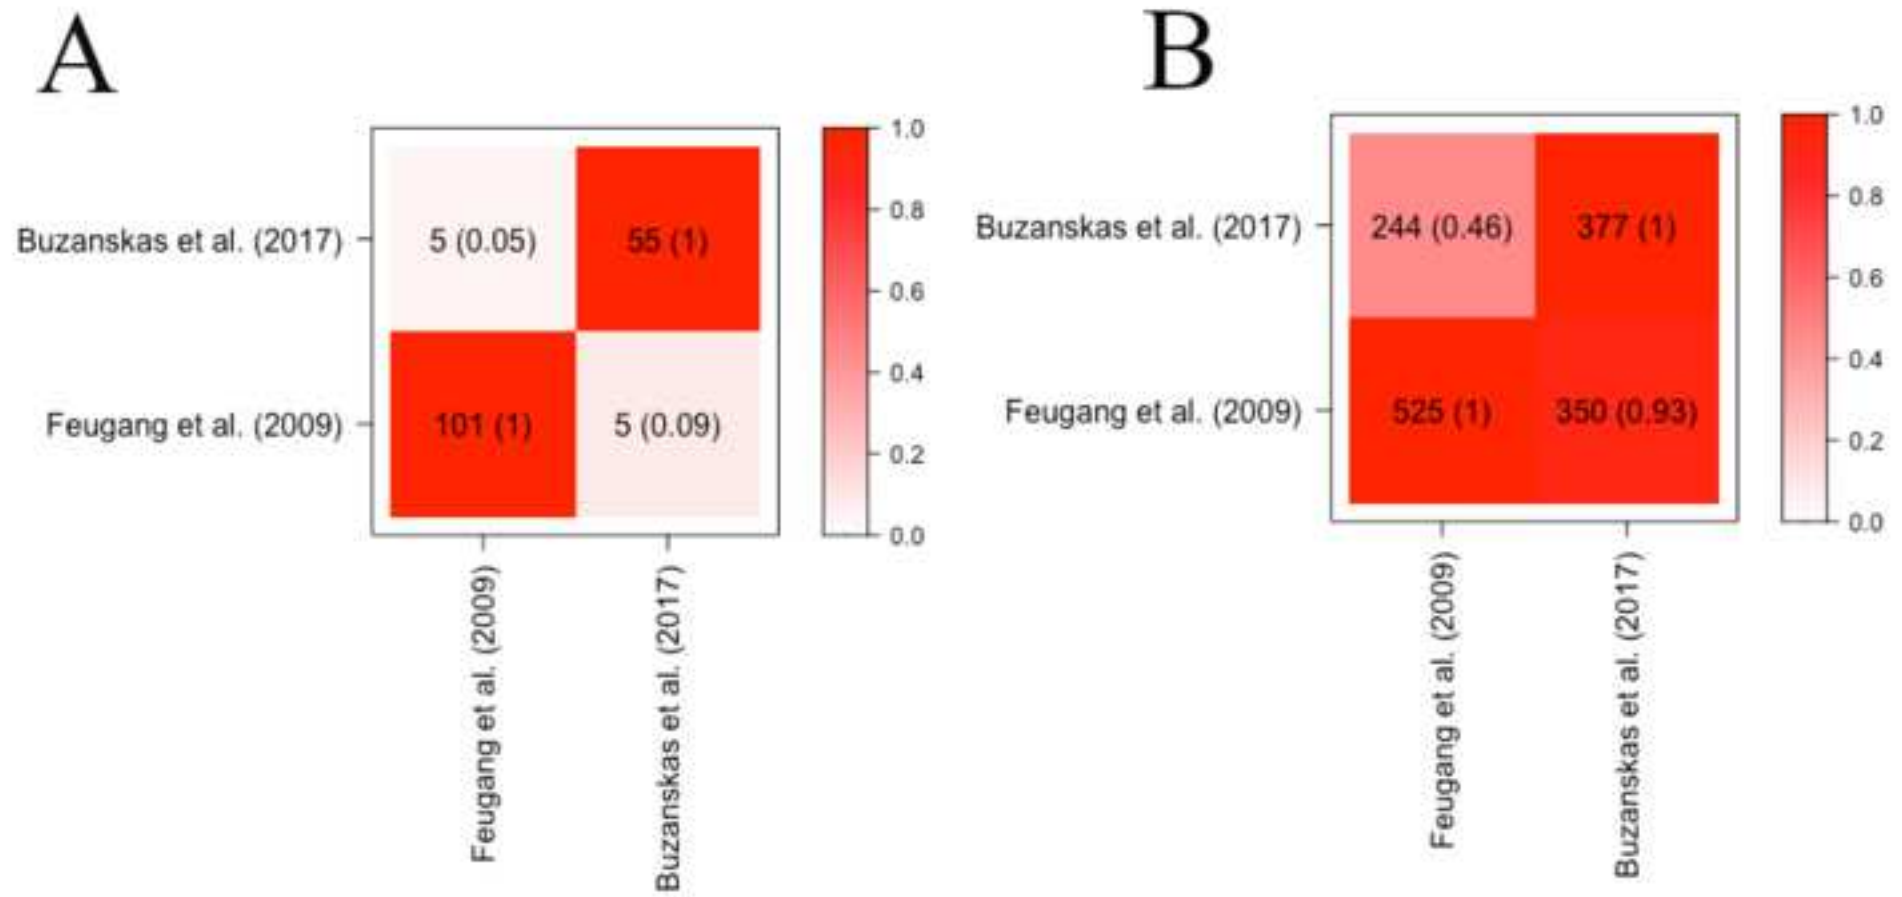

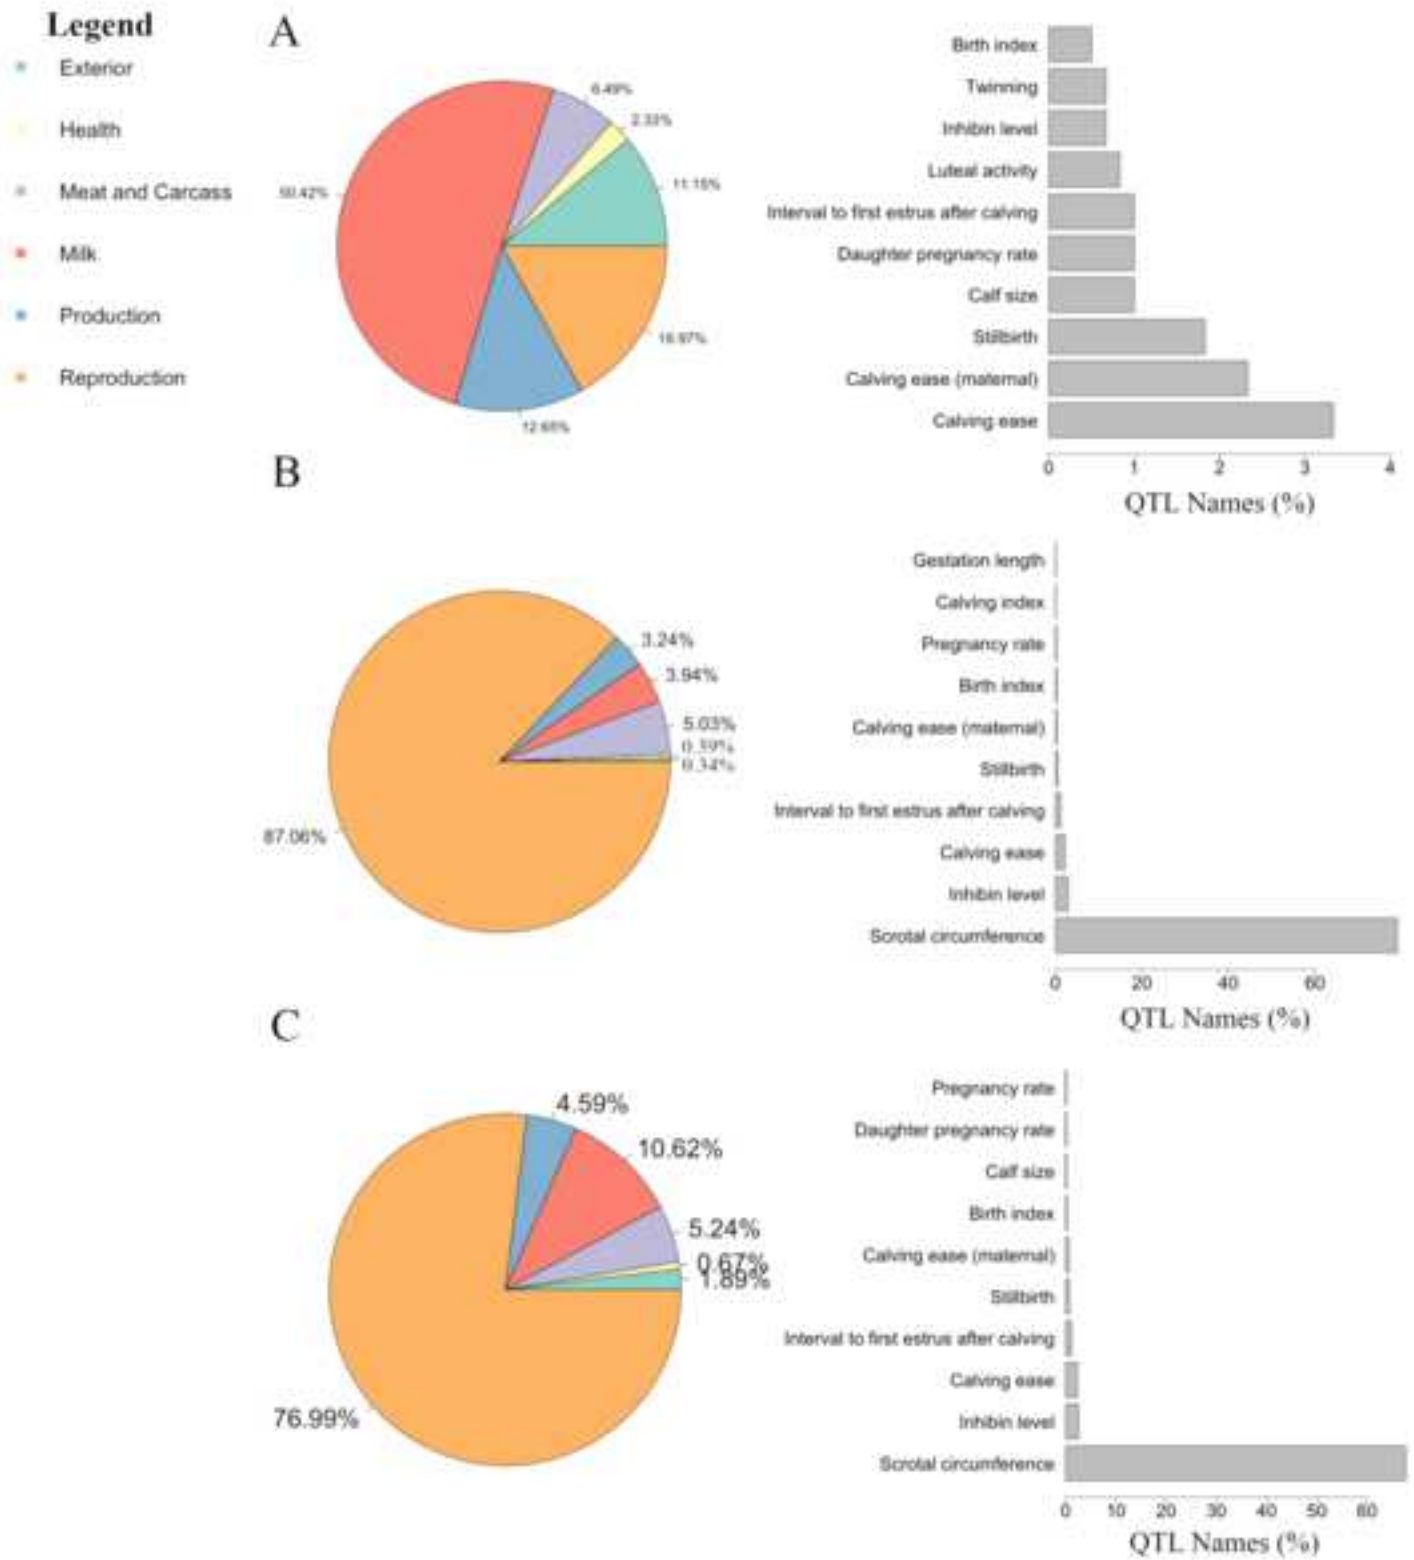

Figure 4

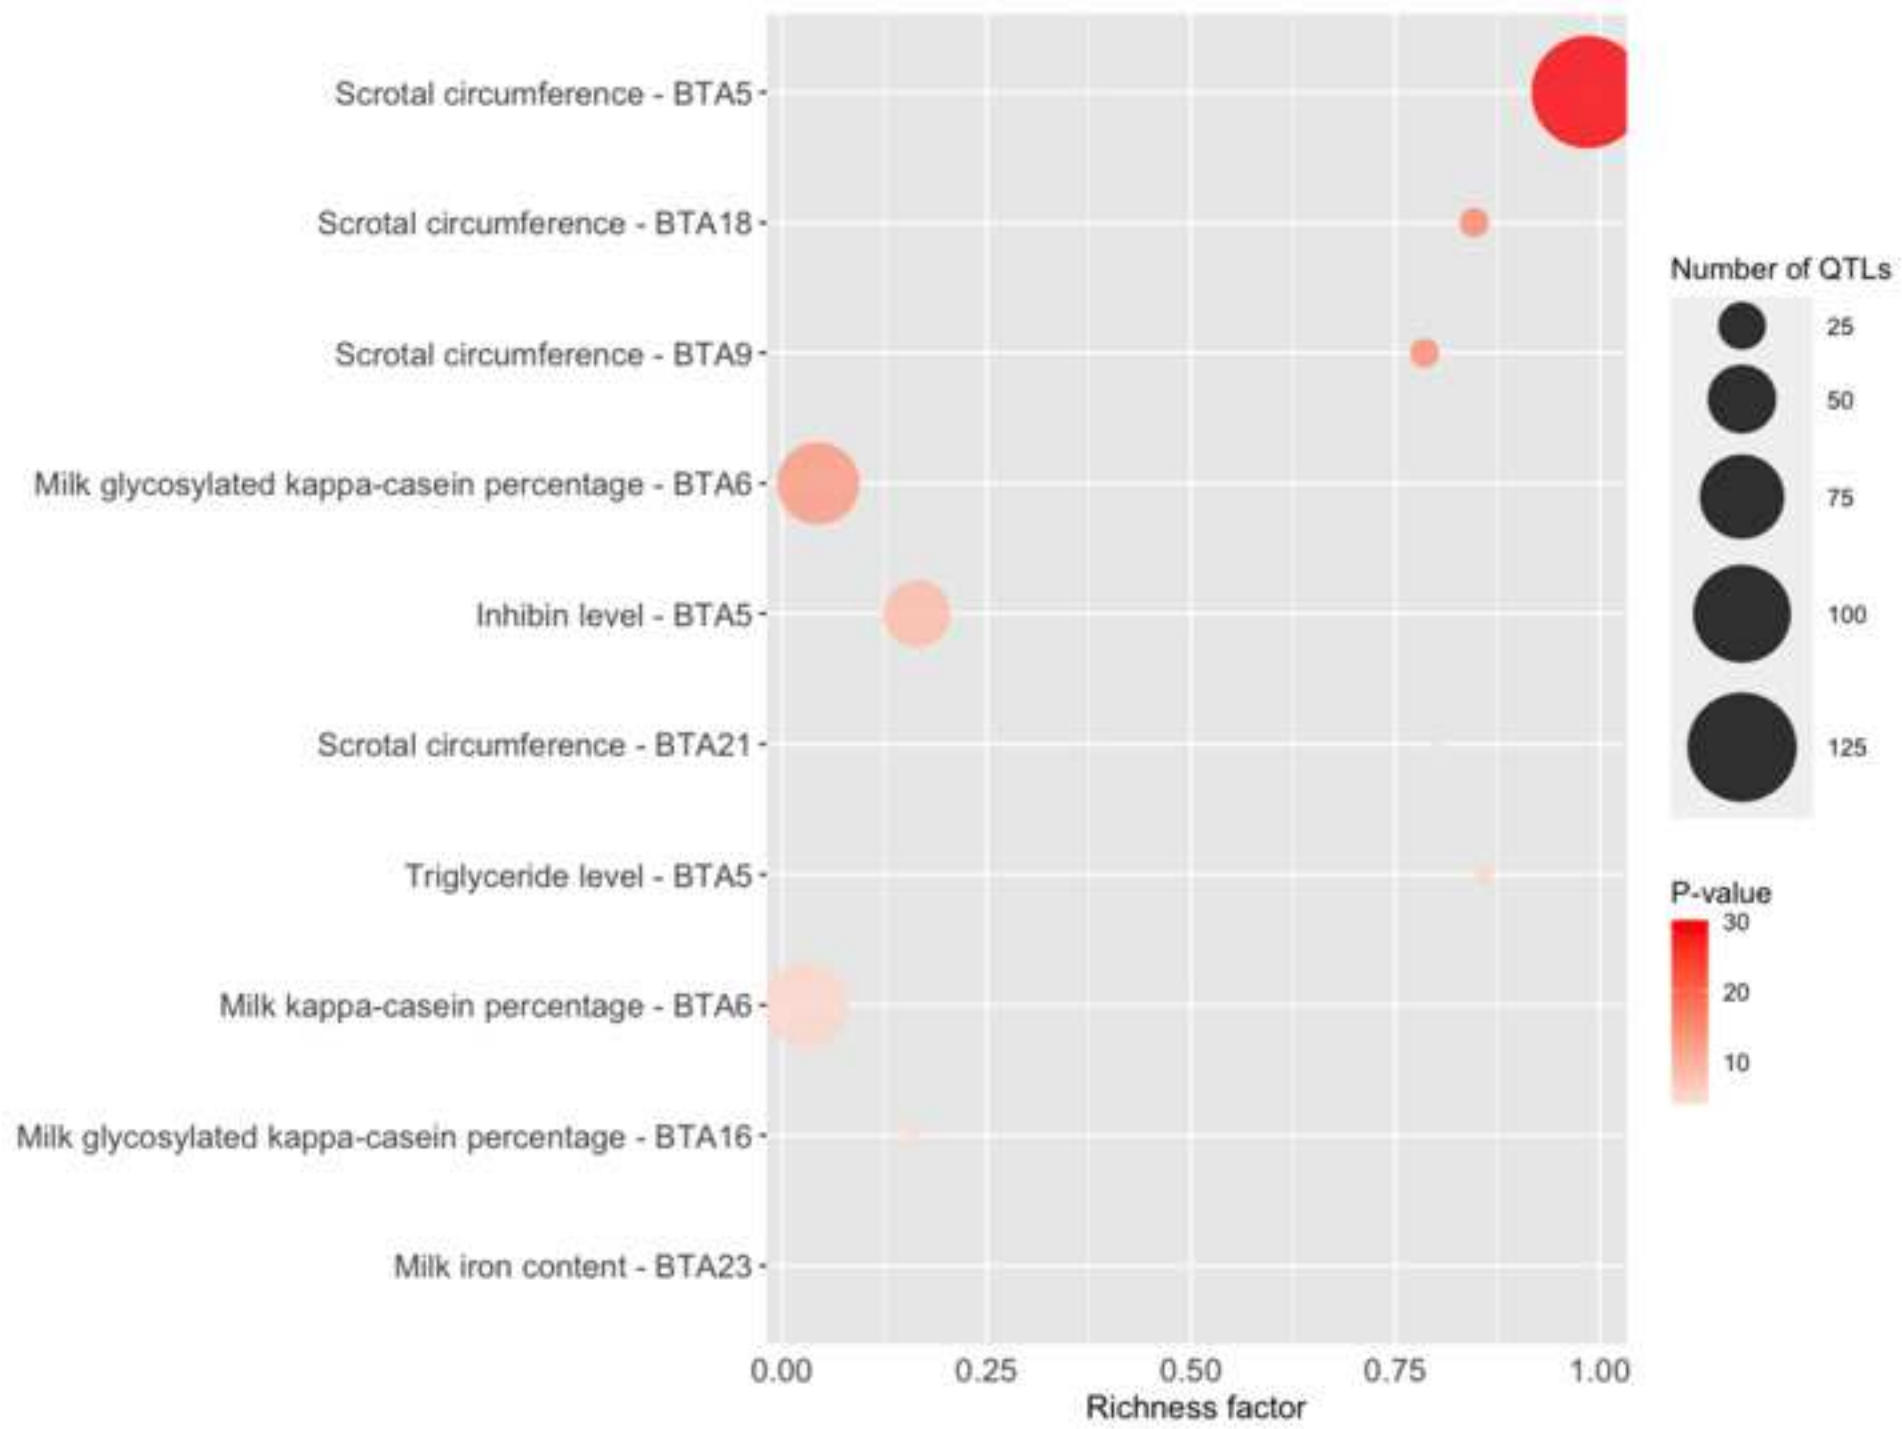

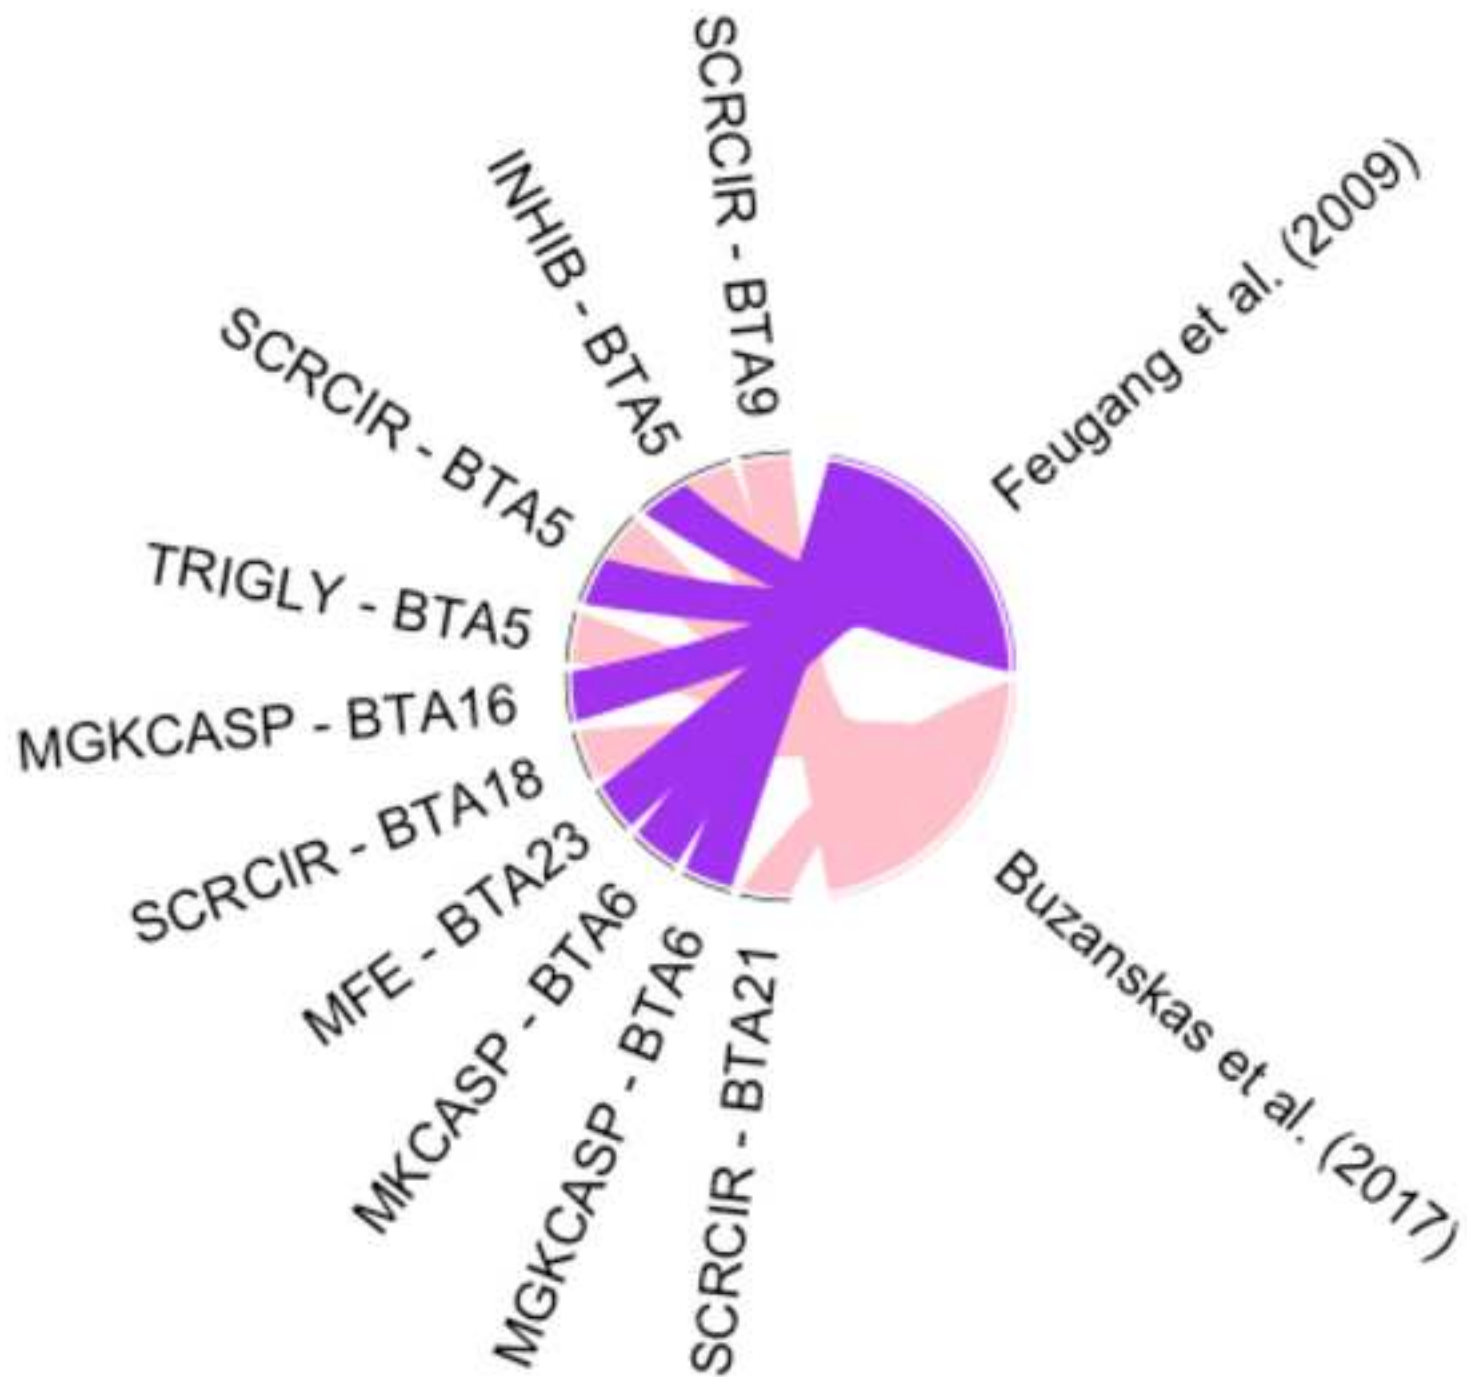



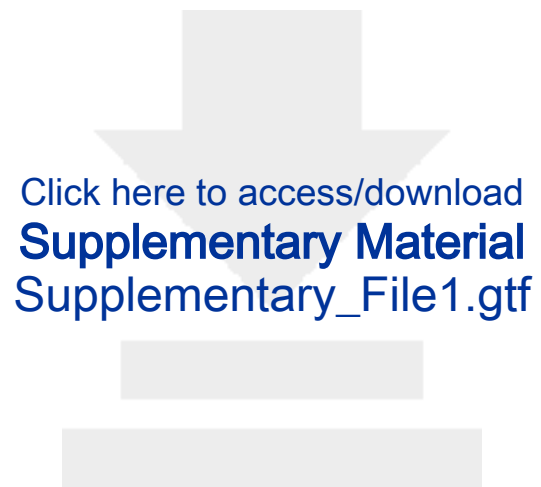

Click here to access/download  
**Supplementary Material**  
Supplementary\_File1.gtf



Click here to access/download  
**Supplementary Material**  
Supplementary\_File2.gff.txt





Click here to access/download  
**Supplementary Material**  
Supplementary\_file3.R



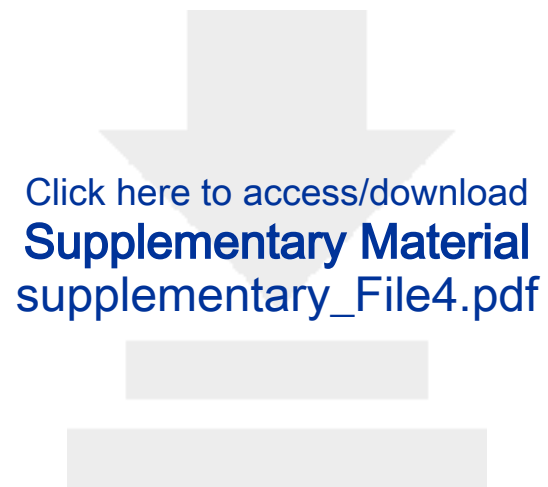

Click here to access/download  
**Supplementary Material**  
supplementary\_File4.pdf

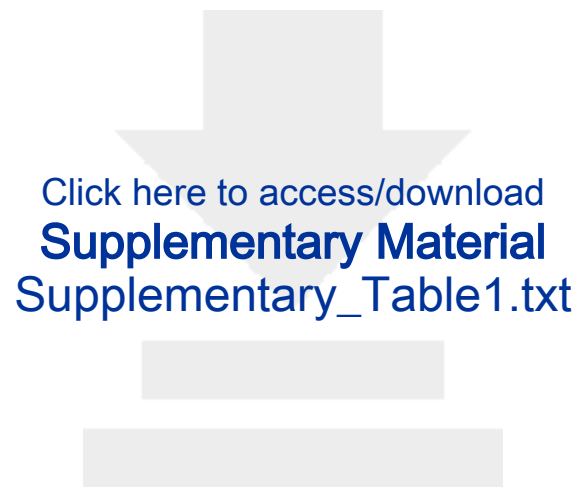

Click here to access/download  
**Supplementary Material**  
Supplementary\_Table1.txt

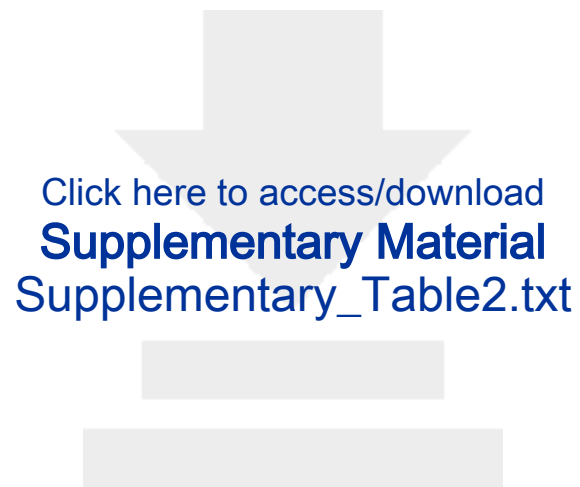

Click here to access/download  
**Supplementary Material**  
Supplementary\_Table2.txt

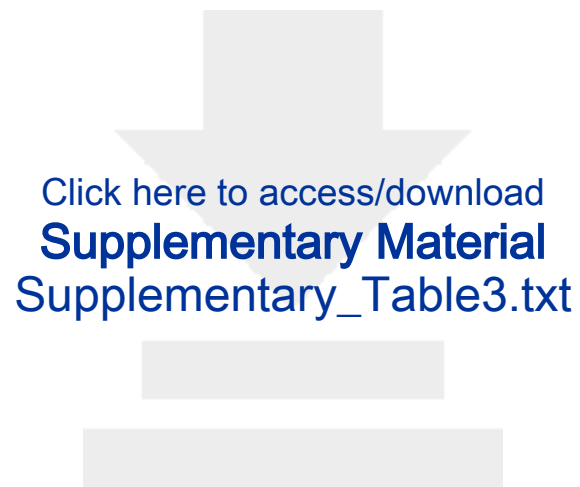

Click here to access/download  
**Supplementary Material**  
Supplementary\_Table3.txt



Click here to access/download  
**Supplementary Material**  
Supplementary\_Table4.txt





Guelph, September 1<sup>st</sup>, 2020

Dear Editorial Office,

We are pleased to re-submit the manuscript entitled “GALLO: An R package for Genomic Annotation and integration of multiple data source in livestock for positional candidate LOci” for consideration to publish it in the GigaScience. This is a resubmission of this manuscript after the inclusion of all the suggestion and considerations raised by the editor and the prior publication of the package in an official repository, in this case, the CRAN.

The present study introduces the applicability and the functionalities of GALLO package, developed in the R environment.

The identification of quantitative trait loci (QTLs) is a crucial step in the improvement of genomic selection and economic profitability in livestock. The development of high-throughput sequencing and genotyping methodologies and precision livestock farming allowed the identification of thousands of genomic regions associated with several complex traits. Consequently, the number of QTLs identified across the genome in livestock species increased substantially in the last years. Currently, in the Animal QTLdb it is possible to retrieve information about QTLs previously identified in cattle (127,191), chicken (11,340), horse (2,260), pig (29,865), rainbow trout (584) and sheep (3,001). The proper integration of the results obtained from different methodologies and technologies available is a crucial step for the accurate identification of the biological processes regulating the development of complex traits as well as the identification of potential functional candidate genes. However, currently, the integration of multiple data sources is not very straightforward due to limitations in the pipelines and algorithms implemented in the tools available for livestock. Moreover, although the automatization is possible, the direct link between the candidate regions and/or markers with the annotated genes and QTLs is missed. Consequently, this gap is forcing the user to back solve the overlap between the input and output files in order to perform the proper association between the candidate region and/or markers and the annotated genes and/or positional co-localized QTLs. In addition, nowadays there is still a lack of for customized QTL enrichment analyses in the available software and databases. Genomic Annotation in Livestock for positional candidate LOci (GALLO) is an R package, for the accurate annotation of genes and QTLs located in regions identified using the most common genomic analyses performed in livestock, such as Genome-Wide Association Studies and transcriptomics using RNA-Sequencing. Moreover, GALLO allows the graphical visualization of gene and QTL annotation results, data comparison among different grouping factors (e.g., methods, breeds, tissues, statistical models, studies, etc.), and QTL enrichment in different livestock species including cattle, pigs, sheep, chicken, etc. Consequently, GALLO is a useful package for annotation, identification of hidden patterns across datasets, datamining of previous reported associations, as well as the efficient scrutinization of the genetic architecture of complex traits in livestock.

We affirm that this manuscript has not been published elsewhere and is not under consideration by any other journal. All authors have approved the manuscript and agree with its submission to GigaScience.

The authors declare that they have no competing interests. With my best regards,

**Angela Cánovas, PhD**

Associate Professor Beef Genomics and Small Ruminants  
University of Guelph  
Department of Animal Biosciences  
Centre for Genetics and Improvement of Livestock  
Telephone: (519) 824-4129 ext. 56295  
email: [acanovas@uoguelph.ca](mailto:acanovas@uoguelph.ca)
