# Supplementary material for: GALLO: An R package for genomic annotation and integration of multiple data sources in livestock for positional candidate loci
Source: PubMed Central journal article supplement (PMC7772745; doi:10.1093/gigascience/giaa149), 2020-12-30
Supplement: giaa149_giga-d-20-00265_revision_2.pdf [file giaa149_giga-d-20-00265_revision_2.pdf]

# GigaScience

## GALLO: An R package for Genomic Annotation and integration of multiple data source in livestock for positional candidate LOci --Manuscript Draft--

|                                                      |                                                                                                                                                                                                                                                                                                                                                                                                                                                                                                                                                                                                                                                                                                                                                                                                                                                                                                                                                                                                                                                                                                                                                                                                                                                                                                      |                   |
|------------------------------------------------------|------------------------------------------------------------------------------------------------------------------------------------------------------------------------------------------------------------------------------------------------------------------------------------------------------------------------------------------------------------------------------------------------------------------------------------------------------------------------------------------------------------------------------------------------------------------------------------------------------------------------------------------------------------------------------------------------------------------------------------------------------------------------------------------------------------------------------------------------------------------------------------------------------------------------------------------------------------------------------------------------------------------------------------------------------------------------------------------------------------------------------------------------------------------------------------------------------------------------------------------------------------------------------------------------------|-------------------|
| <b>Manuscript Number:</b>                            | GIGA-D-20-00265R2                                                                                                                                                                                                                                                                                                                                                                                                                                                                                                                                                                                                                                                                                                                                                                                                                                                                                                                                                                                                                                                                                                                                                                                                                                                                                    |                   |
| <b>Full Title:</b>                                   | GALLO: An R package for Genomic Annotation and integration of multiple data source in livestock for positional candidate LOci                                                                                                                                                                                                                                                                                                                                                                                                                                                                                                                                                                                                                                                                                                                                                                                                                                                                                                                                                                                                                                                                                                                                                                        |                   |
| <b>Article Type:</b>                                 | Technical Note                                                                                                                                                                                                                                                                                                                                                                                                                                                                                                                                                                                                                                                                                                                                                                                                                                                                                                                                                                                                                                                                                                                                                                                                                                                                                       |                   |
| <b>Funding Information:</b>                          | Sustainable Beef and Forage Science Cluster funded by the Canadian Beef Cattle Check-Off, Beef Cattle Research Council, Alberta Beef Producers, Alberta Cattle Feeders' Association, Beef Farmers of Ontario, La Fédération des Producteurs de bovins du Québec, and Agriculture and Agri-Food Canada's Canadian Agricultural Partnership (FDE.13.17)                                                                                                                                                                                                                                                                                                                                                                                                                                                                                                                                                                                                                                                                                                                                                                                                                                                                                                                                                | Dr Angela Cánovas |
| <b>Abstract:</b>                                     | <p>The development of high-throughput sequencing and genotyping methodologies and precision livestock farming allowed the identification of thousands of genomic regions associated with several complex traits. The integration of multiple sources of biological information is a crucial step to better understand patterns regulating the development of complex traits. Genomic Annotation in Livestock for positional candidate LOci (GALLO) is an R package, for the accurate annotation of genes and quantitative trait loci (QTLs) located in regions identified in the most common genomic analyses performed in livestock, such as Genome-Wide Association Studies and transcriptomics using RNA-Sequencing. Moreover, GALLO allows the graphical visualization of gene and QTL annotation results, data comparison among different grouping factors (e.g., methods, breeds, tissues, statistical models, studies, etc.), and QTL enrichment in different livestock species including cattle, pigs, sheep, chicken, etc. Consequently, GALLO is a useful package for annotation, identification of hidden patterns across datasets, datamining of previous reported associations, as well as the efficient scrutinization of the genetic architecture of complex traits in livestock.</p> |                   |
| <b>Corresponding Author:</b>                         | Pablo Augusto de Souza Fonseca<br>University of Guelph<br>Guelph, ON CANADA                                                                                                                                                                                                                                                                                                                                                                                                                                                                                                                                                                                                                                                                                                                                                                                                                                                                                                                                                                                                                                                                                                                                                                                                                          |                   |
| <b>Corresponding Author Secondary Information:</b>   |                                                                                                                                                                                                                                                                                                                                                                                                                                                                                                                                                                                                                                                                                                                                                                                                                                                                                                                                                                                                                                                                                                                                                                                                                                                                                                      |                   |
| <b>Corresponding Author's Institution:</b>           | University of Guelph                                                                                                                                                                                                                                                                                                                                                                                                                                                                                                                                                                                                                                                                                                                                                                                                                                                                                                                                                                                                                                                                                                                                                                                                                                                                                 |                   |
| <b>Corresponding Author's Secondary Institution:</b> |                                                                                                                                                                                                                                                                                                                                                                                                                                                                                                                                                                                                                                                                                                                                                                                                                                                                                                                                                                                                                                                                                                                                                                                                                                                                                                      |                   |
| <b>First Author:</b>                                 | Pablo Augusto de Souza Fonseca                                                                                                                                                                                                                                                                                                                                                                                                                                                                                                                                                                                                                                                                                                                                                                                                                                                                                                                                                                                                                                                                                                                                                                                                                                                                       |                   |
| <b>First Author Secondary Information:</b>           |                                                                                                                                                                                                                                                                                                                                                                                                                                                                                                                                                                                                                                                                                                                                                                                                                                                                                                                                                                                                                                                                                                                                                                                                                                                                                                      |                   |
| <b>Order of Authors:</b>                             | Pablo Augusto de Souza Fonseca                                                                                                                                                                                                                                                                                                                                                                                                                                                                                                                                                                                                                                                                                                                                                                                                                                                                                                                                                                                                                                                                                                                                                                                                                                                                       |                   |
|                                                      | Aroa Suárez-Vega                                                                                                                                                                                                                                                                                                                                                                                                                                                                                                                                                                                                                                                                                                                                                                                                                                                                                                                                                                                                                                                                                                                                                                                                                                                                                     |                   |
|                                                      | Gabiele Marras                                                                                                                                                                                                                                                                                                                                                                                                                                                                                                                                                                                                                                                                                                                                                                                                                                                                                                                                                                                                                                                                                                                                                                                                                                                                                       |                   |
|                                                      | Angela Cánovas                                                                                                                                                                                                                                                                                                                                                                                                                                                                                                                                                                                                                                                                                                                                                                                                                                                                                                                                                                                                                                                                                                                                                                                                                                                                                       |                   |
| <b>Order of Authors Secondary Information:</b>       |                                                                                                                                                                                                                                                                                                                                                                                                                                                                                                                                                                                                                                                                                                                                                                                                                                                                                                                                                                                                                                                                                                                                                                                                                                                                                                      |                   |
| <b>Response to Reviewers:</b>                        | <p>Reviewer reports:<br/>Reviewer #1: The authors have clarified the questions I had and included the clarification appropriately in the manuscript.</p> <p>L298-302: this should be in the discussion not in the conclusion. One reviewer</p>                                                                                                                                                                                                                                                                                                                                                                                                                                                                                                                                                                                                                                                                                                                                                                                                                                                                                                                                                                                                                                                       |                   |

suggested to include more species than just livestock and the authors responded that it is possible as long as the species has a resource list like the AnimalQTL database. "We acknowledge this comment in the revised version of the manuscript and have included a sentence highlighting the applicability to other species (Lines 298-302)." This sentence is added to the conclusion, however, I urge discussing it in the discussion. It is a point of discussion and not a conclusion of the core manuscript. (If properly discussed it may be included in the conclusion.)

Answer: Thank you for your suggestion. We edited the current version of the manuscript and the information about applicability to other species was moved to the discussion section.

Some more textual errors arose in the newly written sections:  
L277: remove one 'the'

Answer: Done.

L278: change 'sama' into 'same'

Answer: Done.

L282: change 'easy to be handle' into easy to handle or easy to be handled

Answer: Done.

L283: change 'have' into 'has'

Answer: Done.

Just a note for future revisions: For this comment & answer below (Reviewer 1) I didn't find the sections on the lines indicated, but elsewhere (141-153 & 277-285). Please make sure you refer to the correct line-numbers in the future to accommodate the reviewers.

The authors indicated that the R package is similar to BiomaRt, and gave performance differences in term of execution time of comparable commands. BiomaRt is a renowned package and was faster. It would be nice if the authors can indicate what benefits GALLO has over BiomaRt. Why was this package needed (e.g. what did you miss in biomaRt)?

Also it may be worthwhile to explicitly indicate why R is the appropriate language for this package. There are things mentioned scattered over the paper, e.g. like visuals and no need for intermediate output files, please summarize them somewhere.

Answer: Thank you for the comment. The comparison between GALLO and other available tools is better discussed on lines 241-253 and 468-476 of the revised version of the manuscript.

Answer: Thank you very much for the comment. In the next submissions the authors will be awarded about this issue.

|                                                                               |                 |
|-------------------------------------------------------------------------------|-----------------|
| <b>Additional Information:</b>                                                |                 |
| <b>Question</b>                                                               | <b>Response</b> |
| Are you submitting this manuscript to a special series or article collection? | No              |
| <b>Experimental design and statistics</b>                                     | Yes             |
| Full details of the experimental design and                                   |                 |

|                                                                                                                                                                                                                                                                                                                                                                                                                                                                                                                                                         |            |
|---------------------------------------------------------------------------------------------------------------------------------------------------------------------------------------------------------------------------------------------------------------------------------------------------------------------------------------------------------------------------------------------------------------------------------------------------------------------------------------------------------------------------------------------------------|------------|
| <p>statistical methods used should be given in the Methods section, as detailed in our <a href="#">Minimum Standards Reporting Checklist</a>. Information essential to interpreting the data presented should be made available in the figure legends.</p> <p>Have you included all the information requested in your manuscript?</p>                                                                                                                                                                                                                   |            |
| <p><b>Resources</b></p> <p>A description of all resources used, including antibodies, cell lines, animals and software tools, with enough information to allow them to be uniquely identified, should be included in the Methods section. Authors are strongly encouraged to cite <a href="#">Research Resource Identifiers</a> (RRIDs) for antibodies, model organisms and tools, where possible.</p> <p>Have you included the information requested as detailed in our <a href="#">Minimum Standards Reporting Checklist</a>?</p>                     | <p>Yes</p> |
| <p><b>Availability of data and materials</b></p> <p>All datasets and code on which the conclusions of the paper rely must be either included in your submission or deposited in <a href="#">publicly available repositories</a> (where available and ethically appropriate), referencing such data using a unique identifier in the references and in the “Availability of Data and Materials” section of your manuscript.</p> <p>Have you have met the above requirement as detailed in our <a href="#">Minimum Standards Reporting Checklist</a>?</p> | <p>Yes</p> |

1     **GALLO: An R package for Genomic Annotation and integration of multiple**  
2             **data sources in Livestock for positional candidate LOci**

3             Pablo A.S. Fonseca<sup>1\*</sup>, Aroa Suárez-Vega<sup>1</sup>, Gabriele Marras<sup>1,2</sup>, and Ángela Cánovas<sup>1\*</sup>

4     <sup>1</sup>University of Guelph, Department of Animal Biosciences, Centre for Genetic Improvement of  
5     Livestock, Guelph, N1G 2W1, Ontario, Canada.

6     <sup>2</sup>The Semex Alliance, Guelph N1G 3Z2, Ontario, Canada

7     Contact:

8     PASF: pfonseca@uoguelph.ca - <https://orcid.org/0000-0002-6917-7475>

9     ASV: asuarezv@uoguelph.ca - <https://orcid.org/0000-0002-7726-4288>

10    GM: gmarras@uoguelph.ca - <https://orcid.org/0000-0001-5115-370X>

11    AC: acanovas@uoguelph.ca - <https://orcid.org/0000-0002-0036-0757>

12    \* Corresponding author

13

14 **Abstract**

15 **Background:** The development of high-throughput sequencing and genotyping methodologies  
16 allowed the identification of thousands of genomic regions associated with several complex traits.  
17 The integration of multiple sources of biological information is a crucial step required to better  
18 understand patterns regulating the development of these traits. **Findings:** Genomic Annotation in  
19 Livestock for positional candidate LOci (GALLO) is an R package developed for the accurate  
20 annotation of genes and quantitative trait loci (QTLs) located in regions identified in common  
21 genomic analyses performed in livestock, such as Genome-Wide Association Studies and  
22 transcriptomics using RNA-Sequencing. Moreover, GALLO allows the graphical visualization of  
23 gene and QTL annotation results, data comparison among different grouping factors (e.g.,  
24 methods, breeds, tissues, statistical models, studies, etc.), and QTL enrichment in different  
25 livestock species including cattle, pigs, sheep, and chickens, etc. **Conclusions:** Consequently,  
26 GALLO is a useful package for the annotation, identification of hidden patterns across datasets,  
27 datamining previously reported associations, as well as the efficient scrutinization of the genetic  
28 architecture of complex traits in livestock.

29 **Keywords:** Multi-omics integration; QTL annotation; Gene annotation; Datamining; QTL  
30 enrichment analysis; Livestock

31

32

33

34

## 35 **Background**

36 The identification of quantitative trait loci (QTLs), genomic regions linked to complex traits  
37 through association tests using genetic markers and phenotypic traits, is a crucial step in the  
38 improvement of genomic selection and economic profitability in livestock [1–4]. The development  
39 of high-throughput methodologies (e.g., Genome-Wide Association Studies, Transcriptomics,  
40 Metabolomics, Proteomics, etc.) for the study of the genetic architecture of complex traits allows  
41 for the identification of potential candidate genes associated with economically relevant traits in  
42 livestock. Taken together, these technologies can substantially improve the accuracy of detection  
43 of candidate regions associated with economically important traits across the genome in livestock  
44 species [5]. Consequently, the number of QTLs identified across the genome in livestock species  
45 increased substantially in the last few years. As of October 2020, the Animal QTLdb can retrieve  
46 information about QTLs previously identified in cattle (159,844), chickens (12,508), horses  
47 (2,451), pigs (30,871), rainbow trout (584) and sheep (3,411) [6]. The proper integration of results  
48 obtained from different methodologies and technologies is a crucial step for the accurate  
49 identification of the biological processes regulating complex traits as well as, the identification of  
50 potential functional candidate genes for each trait or those shared among traits [5,7–9]. The  
51 integration of both structural and functional data can help scrutinize the genetic architecture of  
52 economically relevant traits, and consequently, help to better understand complex biological  
53 patterns regulating the expression of these traits, such as pleiotropic effects, epistasis, and genetic  
54 hitchhiking, among others.

55 Despite the potential to improve the identification of functional candidate genes and/or QTLs  
56 through the integration of multiple data sources, the current process poses limitations in the  
57 pipelines and algorithms implemented in the tools available for livestock. Currently, there are

58 several tools that implement functions for gene (i.e., Biomart and BEDTools) and QTL annotation  
59 (Animal QTLdb) [6,10,11]. However, these tools have limitations regarding the automatization  
60 process to analyze results from multiple candidate regions (Biomart web application and the R  
61 package and Animal QTLdb) or for the visualization of the results. Moreover, although  
62 automatization is possible, there is no direct link between the candidate regions and/or markers  
63 with the annotated genes and QTLs. Consequently, this gap forces the user to back solve the  
64 overlap between the input and output files in order to perform the proper association between the  
65 candidate region and/or markers and the annotated genes and/or positional co-localized QTLs. In  
66 addition, there is still a need for customized QTL enrichment analyses in the available software  
67 and databases. The Genomic Annotation in Livestock for positional candidate LOci (GALLO) is  
68 an R package designed to provide an automatized and a straightforward environment for gene and  
69 QTL annotation in multiple candidate regions, as well as the integration of data from multiple  
70 sources. Additionally, the QTL enrichment analysis can be performed directly by GALLO using  
71 the output obtained from the QTL annotation step. GALLO also provides a set of functions for  
72 graphical visualization of the annotation, comparison, integration and QTL enrichment results. In  
73 this context, the GALLO package was developed as an alternative tool: 1) to allow the integration  
74 and simultaneous annotation of multiple datasets for genes and QTLs; 2) to provide graphical  
75 visualization tools to visually integrate the annotation and similarity against datasets; 3) to perform  
76 QTL enrichment analysis for the positional candidate genomic regions and/or markers associated  
77 with economically relevant traits in livestock.

## 78 **Implementation**

79 The GALLO package was written in the R language [12]. The stable release is available as an R  
80 package on CRAN (<https://cran.r-project.org/web/packages/GALLO/index.html>). The code was

81 extensively tested with several datasets from different sources and methodologies and reviewed to  
82 ensure it meets the packages high quality standards. Additionally, the vignettes were created to be  
83 comprehensive and to present practical examples in order to provide a user-friendly tutorial.

84 The GALLO package provides a useful set of functions that gives a straightforward approach to  
85 data integration, comparison, gene and QTL annotation, and visualization of several data sources  
86 and methodologies, such as variants from genome-wide association study (GWAS), RNA-  
87 Sequencing, whole-genome sequencing, etc. (Figure 1 and Table 1). The main advantage to  
88 perform an automated analysis from multiple datasets is the ability to handle the output using  
89 different subsets (traits, populations, models, etc.) in the same environment without generating  
90 multiple intermediate output files.

#### 91 *Case study – Candidate regions for scrotal circumference and fertility in cattle*

92 The dataset used to present the basic usage and advantages of the GALLO package is composed  
93 by the markers significantly associated with scrotal circumference in the Canchim breed [13] and  
94 noncompensatory fertility in Holstein cattle [14]. These two studies were previously analyzed  
95 together in a systematic review regarding male fertility in cattle [8]. Therefore, the data used herein  
96 comprises a multi-study and multi-breed analysis. These candidate markers (527 single nucleotide  
97 polymorphisms (SNPs)) are available in Supplementary Table 1. In addition to the candidate  
98 markers, we presented as Supplementary Files 1 and 2, the annotation gff file containing the QTL  
99 database information for cattle (obtained from the Animal QTLdb;  
100 [https://www.animalgenome.org/cgi-bin/QTLdb/BT/download?file=gffUMD\\_3.1](https://www.animalgenome.org/cgi-bin/QTLdb/BT/download?file=gffUMD_3.1)) and the gtf file  
101 containing the genes annotated in the cattle genome obtained from Ensembl  
102 ([ftp://ftp.ensembl.org/pub/release-94/gtf/bos\\_taurus/](ftp://ftp.ensembl.org/pub/release-94/gtf/bos_taurus/)). The genomic coordinates of both files were



103 based on the bovine reference genome version UMD 3.1 due to the original coordinates used to  
104 report the location of the candidate markers in the original studies. Here, the analysis performed  
105 follows the same logical order to the one presented in the GALLO vignette  
106 ([https://rpubs.com/pablo\\_bio/GALLO\\_vignette](https://rpubs.com/pablo_bio/GALLO_vignette)). However, the dataset used in the user practical  
107 tutorial is a subset of the data presented here, aiming to reduce the computational demand for the  
108 user. The script with all the commands used to perform the analysis presented here are available  
109 in Supplementary File 3. All the tests were performed using a desktop with a processor Intel Core  
110 i5 2.4 GHz with 8 Gb of RAM memory.

### 111 *Importing datasets and annotating genes and QTLs around candidate markers*

112 The first step in the pipeline consists of importing the databases which will be used for the analysis  
113 with the *import\_gff\_gtf()* function. In our specific example, we imported both cattle gene  
114 annotation (gtf) and QTL (gff) databases. The *import\_gff\_gtf()* function receives the database file  
115 (db\_file) and the file type (*file\_type*= “gff” or “gtf”) as arguments and creates a dataframe with  
116 the respective information from each file. The system time taken to import the gtf and gff files  
117 were 0.045 and 0.311 seconds, respectively, indicating an efficient importing process. The file  
118 containing the candidate markers can be imported using any available function in the R  
119 environment such as *read.table()* and *read.csv()*.

120 The main function of GALLO, *find\_genes\_qtls\_around\_markers()*, performs the annotation of  
121 genes and/or co-localized QTLs within or nearby candidate markers or genomic regions (using the  
122 user’s defined interval/window). This function uses the information provided in the .gtf file (for  
123 gene annotation) or .gff (for QTL annotation) to retrieve the requested information. The output  
124 combines the information available in the input file provided by the user with the information

125 available for the genes and QTLs mapped in the candidate genomic regions. For example, for an  
126 input file composed of three genomic coordinates where four genes are annotated in each of the  
127 intervals determined by the user, the output file of *find\_genes\_qtls\_around\_markers()* will contain  
128 12 rows. The minimum information necessary for the gene and QTL annotation procedures is a  
129 data frame with two columns containing the chromosome (CHR) and position in base pairs (BP)  
130 in the case of the candidate SNPs input file. In the case of the candidate haplotypes, windows,  
131 copy number variations (CNVs) or candidate regions; the input file is composed by three columns  
132 corresponding to the chromosome (CHR), the start position in base pairs (BP1) and the end  
133 position in base pairs (BP2). Data examples for the candidate markers and windows input files can  
134 be obtained using the *data("QTLmarkers")* and *data("QTLwindows")* commands in R.  
135 Additionally, examples of QTL and gene annotation results are accessible through the  
136 *data("gtfGenes")* and *data("gffQTLs")* commands, respectively. These outputs can be easily  
137 handled by summary functions in R, such as *table()*, to obtain information such as the total number  
138 of genes and QTLs, the number of genes and QTLs annotated per variants, etc. The gene annotation  
139 process was compared with the *getBM()* function from the biomaRt package. The gene annotation  
140 process on GALLO needed 0.424 seconds to completely annotate the genes in a 200 Kb interval  
141 (upstream and downstream) from candidate markers, while the biomaRt function required 0.019  
142 seconds. The QTL annotation on GALLO was compared with the Bedtools -wao -C command,  
143 resulting in 0.851 and 0.12 seconds required for each approach, respectively. It is important to  
144 highlight that for both gene and QTL annotation using biomaRt and Bedtools, respectively, a  
145 posterior processing of the output file is required in order to match the candidate markers and the  
146 genes and QTLs mapped within the candidate intervals. On the other hand, the output file from  
147 *find\_genes\_qtls\_around\_markers()* function was designed to allow this match in an intuitive way,

148 combining the rows of both candidate markers file and database files (gff and gtf). Additionally,  
149 GALLO allows the user to perform both annotations for genes and QTLs with a single software  
150 and programming language. Consequently, GALLO obtains a more elaborate and informative  
151 output without substantially compromising the computational demand required for the analysis.  
152 The output files obtained in the gene and QTL annotation are available on Supplementary Tables  
153 2 and 3, respectively.

154 *Comparing and visualizing the overlapping of genes and QTLs annotated within the candidate*  
155 *regions*

156 The output file generated by the *find\_genes\_qtls\_around\_markers()* function can be used as an  
157 input file for the other set of GALLO functions. An advantage from the output of  
158 *find\_genes\_qtls\_around\_markers()* function is that any additional information present in the input  
159 file will be retained in the output file. Consequently, this information can be used to compare the  
160 retrieved information between groups of population, methodologies, statistical models, etc. For  
161 example, the functions *overlapping\_among\_groups()* and *plot\_overlapping()* can be used to create  
162 matrices with the overlapping values among groups and to visualize this overlap. Figure 2 shows  
163 the genes and QTLs overlapping between the positional markers obtained in the two selected  
164 studies from the dataset of markers analyzed, Feugang et al. (2009) [14] and Buzanskas et al.  
165 (2017) [13]. It is important to highlight that the overlapping matrix informing the percentage of  
166 shared records is not symmetrical. The percentage of genes from study A shared with the study B,  
167 and vice-versa, are calculated as a function of the total number of genes in A or B, respectively.  
168 Briefly, this matrix is not symmetrical because GALLO calculates the percentage of records shared  
169 as a function of the total number of records for each group. For example, groups A and B shared  
170 5 records, where group A has 10 records in total and group B has 5 records. Consequently, the

171 percentage of shared records in A is 50% while the percentage of shared genes in B is 100%. In  
172 the current example, it is possible to note that only a small percentage of the positional candidate  
173 genes were shared between the studies. However, the analyses of overlapping QTLs (using the  
174 trait name as reference ID) indicated a higher similarity between the studies, 46% of the QTLs  
175 annotated in the candidate regions from Feugang et al. (2010) [14] were also present in Buzanskas  
176 et al. (2017) [13] and 93% of the QTLs annotated in the candidate regions from Buzanskas et al.  
177 (2017) were also present in Feugang et al. (2010) [13,14].

### 178 *Understanding the QTL context of the candidate regions*

179 A more precise investigation of the QTL representativeness and diversity can help to better  
180 understand the genomic context of the candidate regions. The recurrent association of particular  
181 genomic regions with multiple traits might suggest the presence of complex genetic mechanisms  
182 regulating that region, such as pleiotropy, epistasis, hitchhiking effect, among others [15,16]. The  
183 *plot\_qtl\_info()* function from GALLO allows for the graphical visualization of the summary of  
184 QTL types and traits annotated. The percentage of each QTL type for cattle (i.e., milk, meat and  
185 carcass, health, production, reproduction and exterior) annotated within the candidate regions is  
186 presented in a pie plot through the use of the argument *qtl\_plot="qtl\_type"*, while the percentage  
187 of each trait associated with a specific QTL type can be plotted using the argument  
188 *qtl\_plot="qtl\_name"* and informing the additional argument *qtl\_class* (that must receive the name  
189 of the QTL class to be plotted). Figure 3 shows that for Feugang et al. (2009) [14] the two most  
190 frequent QTL types were Milk (50.42%) and Reproduction (16.97%), while for Buzanskas et al.  
191 (2017) [13] the most frequent QTL types were Reproduction (87.06%) and Meat and Carcass  
192 (5.03%). An in-depth analyses can be performed for each QTL type in order to observe the  
193 frequency of each trait associated with a specific QTL type. The most frequent traits related with

194   Reproduction QTLs were calving ease (>3%) and scrotal circumference (>60%) for Feugang et al.  
195   (2009) and Buzanskas et al. (2017) [13,14], respectively (Figure 3). The comparison between the  
196   frequency of traits related with Reproduction QTLs annotated in Feugang et al. (2009) and  
197   Buzanskas et al. (2017) [13,14] indicated that among the top 10 most frequent QTLs, calving ease,  
198   inhibin levels, stillbirth, interval to first estrus after calving, and birth index were shared between  
199   the studies. The combined analysis (not filtering by study) indicated that the Reproduction and  
200   Milk QTL types were the two most frequent classes with 76.99% and 10.62% of all QTL types,  
201   respectively. In addition, scrotal circumference, inhibin level and calving ease were the most  
202   frequent Reproduction QTL related traits in the combined analysis.

### 203   *QTL enrichment analysis*

204   In some cases, the biases produced with more research in certain areas/traits of higher relevance  
205   to animal production (such as milk production related traits in the QTL database for cattle) may  
206   result in a larger proportion of records for these traits in the QTL database. Consequently, the  
207   simple investigation of the proportion of each QTL type might not be totally useful. The GALLO  
208   package allows the user to perform a QTL enrichment analysis to test the significance of the QTL  
209   representativeness. The QTL enrichment analysis function in the GALLO package is based on a  
210   hypergeometric test approach, where the number of QTLs annotated within the candidate regions  
211   for each QTL type or trait, is compared with the observed number of QTLs in the reference  
212   database. Briefly, using an enrichment for individual traits in a chromosome-wide approach as an  
213   example, the number of traits per chromosome annotated within the candidate regions and the total  
214   number of each individual trait in the QTL database are computed. Subsequently, this information  
215   is integrated into a hypergeometric test in order to estimate if the number of observed records, for  
216   a specific trait, in a chromosome is larger than expected by chance. The *qtl\_enrich()* function

217 allows the user to perform the QTL enrichment analysis for both QTL types and traits (*qtl\_type*=  
218 “*QTL\_type*” or “*Name*”), for the whole genome or chromosome-wide (*enrich\_type*= “*genome*”  
219 or “*chromosome*”) and for all the annotated chromosomes or a subset (*chr.subset*= *NULL* or the  
220 object with the subset of chromosomes). The use of a chromosome-wide enrichment analysis  
221 might help to detect specific regions across the genome with a high number of QTLs for a specific  
222 trait, i.e. BTA14 in cattle for milk production [17]. A total of 161 unique pairs of traits and  
223 chromosomes were tested for the enrichment using the annotated QTLs from both studies. The  
224 system time required to perform the enrichment analysis was 5.32 seconds, suggesting efficient  
225 processing. The top 10 enriched QTLs (False Discovery Rate (FDR) < 0.05) for the combined  
226 analysis is shown in Table 2 and the enrichment results for all the annotated QTLs is shown in  
227 Supplementary Table 4. Additionally, GALLO also allows the user to obtain a graphical  
228 visualization, in a bubble plot, of the enrichment results using the *QTLenrich\_plot()* function. This  
229 function receives the enriched table obtained from *qtl\_enrich()*, the name of the column with the  
230 trait names to be plotted and the name of the column with the p-values to be plotted as arguments.  
231 A total of 28 pairs of traits and chromosomes were found to be enriched in the combined analysis,  
232 with scrotal circumference (BTA 5, 18, 9, and 21), milk glycosylated kappa-casein percentage  
233 (BTA 6 and 16), inhibin level (BTA 5), triglyceride level (BTA 5), milk kappa-casein percentage  
234 (BTA 6) and milk iron content (BTA 23) in the list of top 10 most enriched traits. Figure 4 shows  
235 the top 5 enriched QTLs identified in this analysis.

### 236 *Relationship between studies and enriched QTLs*

237 An interesting functionality of GALLO is the graphical visualization of the relationship between  
238 groups using a chord plot. The *relationship\_plot()* function receives as arguments a dataframe (it  
239 can use the gene or QTL annotation results, the QTL enrichment, or any other table with two

240 groups of information to be compared), the two groups to be compared (arguments x and y) and  
241 the graphical arguments to set the size, color and gap between the sector in the chord plot. Figure  
242 5 shows the chord plot obtained using a subset of the QTL annotation dataframe composed only  
243 by the top 10 enriched traits and the studies which these traits were annotated. This plot indicates  
244 that only inhibin levels and scrotal circumference on BTA5 are shared between Feugang et al.  
245 (2009) and Buzanskas et al. (2017) [13,14]. Additionally, milk glycosylated kappa-casein  
246 percentage (BTA 6 and 16), milk kappa-casein percentage (BTA 6) and milk iron content (BTA  
247 23) were annotated only in Feugang et al. (2009) [14] and scrotal circumference (BTA 9, 18, 21)  
248 and triglyceride level (BTA 5) were annotated only in Buzanskas et al. (2017) [13]. Inhibin is  
249 produced by the Sertoli cells and can be used as a biomarker for sexual development [18]. In  
250 addition, the inhibin levels were already associated with both scrotal circumference and sperm  
251 quality traits in several studies, suggesting an important role in male fertility [19–23]. The results  
252 obtained here through the integration of the GWAS results from two independent studies followed  
253 by QTL annotation reinforces this association. Additionally, QTLs not associated with  
254 reproductive phenotypes were identified in the enrichment analysis, suggesting the presence of  
255 complex biological mechanisms such as a pleiotropic effect, epistasis and genetic hitchhiking  
256 effect. Previous studies have highlighted the possible role of genomic regions with these kinds of  
257 processes in the cattle genome [24,25]. An additional integration of the QTL annotation and  
258 enrichment analysis performed here with the gene annotation and prospection for functional  
259 candidate genes can be a powerful tool to better understand the genetic architecture and the  
260 relationship among complex traits.

261

262

## 263 **Discussion**

264 The GALLO package is composed of a group of functions designed to perform an efficient and  
265 direct downstream analysis for the gene and QTL annotation for candidate markers/SNPs,  
266 haplotypes, genomic windows, runs of homozygosity, CNVs, etc. The functions implemented in  
267 GALLO were designed to allow the integration of multiple datasets simultaneously. A brief  
268 summary of these functions is shown in Table 1. For example, GWAS results from multiple traits  
269 and/or populations or breeds can be analyzed together and compared or, individually analyzed in  
270 the downstream analysis. This can be easily performed by adding an extra column in the input file  
271 with the grouping factors to classify each dataset. These input files can be easily adapted from the  
272 output of commonly used softwares to analyze high-throughput genomic data, such as PLINK,  
273 BLUPF90, DESeq2, etc. [26–28]. In addition, GALLO provides a set of functions designed for  
274 the visualization of the annotation results, overlap among groups, relationship between groups  
275 (i.e., markers and candidate genes, datasets and QTLs, models and positional candidate genes,  
276 etc.), and QTL enrichment results. This set of functions provides the capability of integrating  
277 several results from multiple sources including different methodologies (GWAS, RNA-  
278 sequencing, proteomics, etc.), populations (breeds, time-points, etc.), traits or the different  
279 combination of these groups or others. Taken together, this set of functions provide to the  
280 possibility to perform all the steps of gene/QTL annotation, comparison and summary in the same  
281 environment. Additionally, the output obtained using GALLO was designed to allow a direct  
282 connection between the candidate genomic regions and the genes/QTLs which overlap those  
283 regions. Therefore, compared with outputs provided by other tools, such as biomaRt and Bedtools,  
284 the interpretation of the output provided by GALLO is straightforward and easy to handle. Finally,  
285 the QTL enrichment analysis available on GALLO is a useful and new approach that has the



286 potential to better understand the relationship between candidate genomic regions and the target  
287 phenotype. It is important to highlight that despite the fact that GALLO was primarily designed  
288 for livestock species, the package can perform gene annotation and data comparison for any other  
289 species without any additional alterations to the input files. Regarding the QTL annotation and the  
290 respective graphical visualization, the user should provide the gff file from the QTL database in a  
291 format matching the gff files available on Animal QTLdb.

292 A summary of usage examples and output descriptions for all the functions available on GALLO  
293 can be found in the reference manual (Supplementary File 4). It is important to highlight that the  
294 two studies used as an example here are also part of the bovine QTL database. Consequently, the  
295 results obtained here for annotation and enrichment would be expected, once the candidate regions  
296 from the example file are present in the database used for the annotation. This approach was used  
297 as a proof of concept of the methodology and indicates a precise annotation of the candidate  
298 regions.

## 299 **Conclusion**

300 The integration of multiple datasets for gene and QTL annotation is one of the major bottlenecks  
301 for the automatization of functional analysis of the results obtained using high-throughput  
302 methodologies. The GALLO package provides a user-friendly and straightforward environment to  
303 perform gene and QTL annotation, visualization, data comparison and QTL enrichment for  
304 functional studies in livestock species. Consequently, the use of GALLO in the analyses of data  
305 generated from high-throughput methodologies may improve the identification of hidden patterns  
306 across datasets, datamining of previously reported associations, as well as efficiency in the  
307 scrutinization of the genetic architecture of complex traits in livestock.

308 **Availability and requirements**

309 Project name: Genomic Annotation in Livestock for positional candidate LOci (GALLO)

310 Project home page: <https://github.com/pablobio/GALLO>

311 Operating system(s): Platform independent

312 Programming language: R

313 Other requirements: Depends: R ( $\geq 3.5.0$ )

314 License: GPL-3

315 SciCrunch: SCR\_019212

316 Bio.tools: biotools:genomic\_annotation\_in\_livestock\_for\_positional\_candidate\_loci\_gallo

317 **Availability of supporting data**

318 All of the data analyzed in the present study can be accessed in the public repository hosting the  
319 R package (<https://github.com/pablobio/GALLO>). The input files and results used as examples in  
320 the manuscript preparation are available in the supplementary Tables 1-4. A manual including  
321 usage examples and output descriptions for all the functions available on GALLO can be found in  
322 the package vignette (<https://cran.r-project.org/web/packages/GALLO/vignettes/GALLO.html>).  
323 An archival copy of the code and supporting data is available via the GigaScience repository,  
324 GigaDB [28].

325 **Declarations**

326 *List of abbreviations*

327 BP: position in base pairs; BP1: start position in base pairs; BP2: end position in base pairs; CHR:  
328 Chromosome; CNV: Copy Number Variation; GALLO: Genomic Annotation in Livestock for

329 positional candidate Loci; GWAS: Genome-Wide Association Study; QTL: Quantitative trait loci;  
330 SNP: Single Nucleotide Polymorphism.

331 *Ethics approval and consent to participate*

332 Not applicable.

333 *Consent for publication*

334 Not applicable.

335 *Competing interests*

336 The authors declare that they have no competing interests.

337 *Funding*

338 This study was supported by the Sustainable Beef and Forage Science Cluster (FDE.13.17) funded  
339 by the Canadian Beef Cattle Check-Off, Beef Cattle Research Council, Alberta Beef Producers,  
340 Alberta Cattle Feeders' Association, Beef Farmers of Ontario, La Fédération des Producteurs de  
341 bovins du Québec, and Agriculture and Agri-Food Canada's Canadian Agricultural Partnership.  
342 The funders had no role in study design, data collection and analysis, decision to publish, or  
343 preparation of the manuscript.

344 *Authors' contributions*

345 PASF and AC were responsible for the conceptualization. PASF, ASV and AC were responsible  
346 for the data processing and review of the codes. PASF and ASV were responsible for data curation.

347 PASF and GM were responsible for the implementation of the bioinformatic pipeline, integration  
348 of datasets, and the coding. AC was responsible for funding acquisition.

349 *Acknowledgements*

350 Not applicable.

351 **References**

- 352 1. Ron M, Weller JI. From QTL to QTN identification in livestock - Winning by points rather  
353 than knock-out: A review. *Anim. Genet.* 2007.
- 354 2. Ernst CW, Steibel JP. Molecular advances in QTL discovery and application in pig breeding.  
355 *Trends Genet.* 2013.
- 356 3. Miglior F, Fleming A, Malchiodi F, Brito LF, Martin P, Baes CF. A 100-Year Review:  
357 Identification and genetic selection of economically important traits in dairy cattle. *J Dairy Sci.*  
358 2017;
- 359 4. Pértille F, Guerrero-Bosagna C, Silva VH Da, Boschiero C, Nunes JDRDS, Ledur MC, et al.  
360 High-throughput and Cost-effective Chicken Genotyping Using Next-Generation Sequencing.  
361 *Sci Rep.* 2016;
- 362 5. Cánovas A, Reverter A, DeAtley KL, Ashley RL, Colgrave ML, Fortes MRS, et al. Multi-  
363 tissue omics analyses reveal molecular regulatory networks for puberty in composite beef cattle.  
364 *PLoS One.* 2014;
- 365 6. Hu ZL, Park CA, Reecy JM. Building a livestock genetic and genomic information  
366 knowledgebase through integrative developments of Animal QTLdb and CorrDB. *Nucleic Acids*  
367 *Res.* 2019;
- 368 7. De Souza Fonseca PA, Id-Lahoucine S, Reverter A, Medrano JF, Fortes MS, Casellas J, et al.  
369 Combining multi-OMICs information to identify key-regulator genes for pleiotropic effect on  
370 fertility and production traits in beef cattle. *PLoS One.* 2018;13:1–22.

- 371 8. Fonseca PA de S, dos Santos FC, Lam S, Suárez-Vega A, Miglior F, Schenkel FS, et al.  
372 Genetic mechanisms underlying spermatid and testicular traits within and among cattle breeds:  
373 Systematic review and prioritization of GWAS results. *J Anim Sci.* 2018;
- 374 9. Suárez-Vega A, Gutiérrez-Gil B, Benavides J, Perez V, Tosser-Klopp G, Klopp C, et al.  
375 Combining GWAS and RNA-Seq approaches for detection of the causal mutation for hereditary  
376 junctional epidermolysis bullosa in sheep. *PLoS One.* 2015;
- 377 10. Durinck S, Moreau Y, Kasprzyk A, Davis S, De Moor B, Brazma A, et al. BioMart and  
378 Bioconductor: A powerful link between biological databases and microarray data analysis.  
379 *Bioinformatics.* 2005;
- 380 11. Quinlan AR, Hall IM. BEDTools: A flexible suite of utilities for comparing genomic  
381 features. *Bioinformatics.* 2010;
- 382 12. R Core Team (2019). R: A language and environment for statistical computing. Accessed 1st  
383 April 2019. 2019;
- 384 13. Buzanskas ME, Grossi D do A, Ventura RV, Schenkel FS, Chud TCS, Stafuzza NB, et al.  
385 Candidate genes for male and female reproductive traits in Canchim beef cattle. *J Anim Sci*  
386 *Biotechnol.* 2017;
- 387 14. Feugang JM, Kaya A, Page GP, Chen L, Mehta T, Hirani K, et al. Two-stage genome-wide  
388 association study identifies integrin beta 5 as having potential role in bull fertility. *BMC*  
389 *Genomics.* 2009;
- 390 15. Hackinger S, Zeggini E. Statistical methods to detect pleiotropy in human complex traits.  
391 *Open Biol.* 2017.
- 392 16. Id-Lahoucine S, Molina A, Cánovas A, Casellas J. Screening for epistatic selection  
393 signatures: A simulation study. *Sci Rep.* 2019;
- 394 17. Kühn C, Thaller G, Winter A, Bininda-Emonds ORP, Kaupe B, Erhardt G, et al. Evidence  
395 for multiple alleles at the DGAT1 locus better explains a quantitative trait locus with major  
396 effect on milk fat content in cattle. *Genetics.* 2004;

- 397 18. Phillips DJ. Activins, inhibins and follistatins in the large domestic species. *Domest. Anim.*  
398 *Endocrinol.* 2005.
- 399 19. Fortes MRS, Reverter A, Kelly M, Mcculloch R, Lehnert SA. Genome-wide association  
400 study for inhibin, luteinizing hormone, insulin-like growth factor 1, testicular size and semen  
401 traits in bovine species. *Andrology.* 2013;
- 402 20. Fortes MRS, Reverter A, Hawken RJ, Bolormaa S, Lehnert S a. Candidate genes associated  
403 with testicular development, sperm quality, and hormone levels of inhibin, luteinizing hormone,  
404 and insulin-like growth factor 1 in Brahman bulls. *Biol Reprod [Internet].* 2012 [cited 2013 Sep  
405 6];87:58. Available from: <http://www.ncbi.nlm.nih.gov/pubmed/22811567>
- 406 21. Bame JH, Dalton JC, Degelos SD, Good TEM, Ireland JLH, Jimenez-Krassel F, et al. Effect  
407 of Long-Term Immunization against Inhibin on Sperm Output in Bulls1. *Biol Reprod.* 1999;
- 408 22. Martin TL, Williams GL, Lunstra DD, Ireland JJ. Immunoneutralization of Inhibin Modifies  
409 Hormone Secretion and Sperm Production in Bulls1. *Biol Reprod.* 1991;
- 410 23. Sato T, Kudo T, Ikehara Y, Ogawa H, Hirano T, Kiyohara K, et al. Chondroitin sulfate N-  
411 acetylgalactosaminyltransferase 1 is necessary for normal endochondral ossification and  
412 aggrecan metabolism. *J Biol Chem.* 2011;
- 413 24. Bolormaa S, Pryce JE, Reverter A, Zhang Y, Barendse W, Kemper K, et al. A Multi-Trait,  
414 Meta-analysis for Detecting Pleiotropic Polymorphisms for Stature, Fatness and Reproduction in  
415 Beef Cattle. *PLoS Genet.* 2014;10.
- 416 25. Love MI, Huber W, Anders S. Moderated estimation of fold change and dispersion for RNA-  
417 seq data with DESeq2. *Genome Biol.* 2014;15:1–21.
- 418 26. Purcell S, Neale B, Todd-Brown K, Thomas L, Ferreira MAR, Bender D, et al. PLINK: A  
419 tool set for whole-genome association and population-based linkage analyses. *Am J Hum Genet.*  
420 2007;
- 421 27. Misztal I, Tsuruta S, Strabel T, Auvray B, Druet T, H LD. BLUPF90 and related programs  
422 (BGF90). *Proc 7th world Congr Genet Appl to Livest Prod.* 2002. p. 743–4.

423 28. Fonseca PAS, Suárez-Vega A, Marras G, Cánovas A. GALLO: An R  
424 package for Genomic Annotation and integration of multiple data source  
425 in livestock for positional candidate LOci GigaScience Database. 2020.  
426 <http://dx.doi.org/10.5524/100834>

427

428

429 **Tables**

430 Table 1: Description of the functions implemented in the GALLO package.

| Function                       | Description                                                                                                 | Output                                                                                                                                                                             |
|--------------------------------|-------------------------------------------------------------------------------------------------------------|------------------------------------------------------------------------------------------------------------------------------------------------------------------------------------|
| <b>Gene and QTL annotation</b> |                                                                                                             |                                                                                                                                                                                    |
| import_gff_gtf                 | Import the gff and gtf files used for QTL and gene annotation, respectively                                 | A dataframe composed by the information present in the gtf and gff files                                                                                                           |
| find_genes_qtls_around_markers | Annotation of genes and QTLs around candidate regions                                                       | A data frame composed of the columns present in the input file and the genes or QTLs mapped within or around (if interval provided) the candidate regions                          |
| <b>Data visualization</b>      |                                                                                                             |                                                                                                                                                                                    |
| overlapping_among_groups       | Overlap between grouping factors (such as different traits, statistical models, populations, studies, etc.) | A list with three matrices: 1) A matrix with the number of overlapping data; 2) A matrix with the percentage of overlap; 3) A matrix with the combination of the two previous ones |
| plot_overlapping               | Plot overlap between data and grouping factors                                                              | A heatmap with the overlap between groups                                                                                                                                          |
| plot_qtl_info                  | Plot QTL information from the gene or QTL annotation output                                                 | A pie plot (if QTL class is chosen) or a bar plot (if trait name is chosen) for the annotated QTLs                                                                                 |
| relationship_plot              | Plot the relationship among the candidate regions or                                                        | A chord plot linking a grouping factor (genomic regions, traits, populations, etc.) with the annotated genes or QTLs                                                               |



grouping factors with the annotated genes and QTLs

## QTL enrichment

qtl\_enrich

Performs a QTL enrichment analysis based on a Bootstrap simulation for each QTL class or trait

A data frame composed of the enrichment results for QTL classes or traits present in the input file. 1) QTL: The QTL class or trait used for the enrichment; 2) CHR: The chromosome for that specific QTL or trait (if the option "chromosome" is informed to the argument enrich\_type); 3) N\_QTLs: Number of observed QTLs or traits in the dataset; 4) N\_QTLs\_db: Number of each annotated QTL in the qTL database; 5) Total\_annotated\_QTLs: Total number of annotated QTLs; 6) Total\_QTLs\_db: Total number of QTLs in the QTL database; 7) pvalue: P-value for the enrichment analysis; 8) adj.pval: The adjusted p-value based on the multiple test correction selected by the user; 9) QTL\_type= The QTL type for each annotated trait.

QTLenrich\_plot

Creates a bubble plot with the QTL enrichment results

A plot with the QTL enrichment results

---

431

432

433

434

435

436

437 Table 2: Top 10 enriched QTLs for the combined analysis performed with the candidate regions from the two studies, Feugang et al.  
 438 (2009) and Buzanskas et al. (2017), used in the example dataset.

| QTL                                       | CHR | # QTLs | # QTLs db | Total # QTLs | Total # QTLs db | p-value   | FDR        | QTL type     |
|-------------------------------------------|-----|--------|-----------|--------------|-----------------|-----------|------------|--------------|
| Scrotal circumference                     | 5   | 132    | 134       | 347          | 5942            | 1.56E-171 | 4.98E-169  | Reproduction |
| Scrotal circumference                     | 18  | 11     | 13        | 41           | 2147            | 2.20E-18  | 3.52E-16   | Reproduction |
| Scrotal circumference                     | 9   | 11     | 14        | 30           | 1395            | 2.04E-17  | 2.18E-15   | Reproduction |
| Milk glycosylated kappa-casein percentage | 6   | 71     | 1607      | 204          | 12158           | 1.86E-15  | 1.49E-13   | Milk         |
| Inhibin level                             | 5   | 47     | 285       | 347          | 5942            | 3.38E-11  | 2.16E-09   | Reproduction |
| Scrotal circumference                     | 21  | 4      | 5         | 12           | 3606            | 3.51E-10  | 1.87E-08   | Reproduction |
| Milk kappa-casein percentage              | 6   | 76     | 2637      | 204          | 12158           | 2.39E-07  | 1.01E-05   | Milk         |
| Triglyceride level                        | 5   | 6      | 7         | 347          | 5942            | 2.53E-07  | 1.01E-05   | Health       |
| Milk glycosylated kappa-casein percentage | 16  | 7      | 44        | 21           | 1440            | 1.29E-06  | 4.58E-05   | Milk         |
| Milk iron content                         | 23  | 4      | 8         | 19           | 1159            | 3.48E-06  | 0.00011329 | Milk         |

439

440 **Figure legends:**

441 **Figure 1:** Workflow explaining the main functions implemented on GALLO. The grey rectangles represent  
442 the functions, while the rounded and sharp rectangles represent the main goal of that respective function  
443 and its input, respectively.

444 **Figure 2:** Overlapping between genes (A) and QTLs (B) annotated within the candidate regions  
445 (100 Kb downstream and upstream from the significant markers) from Feugang et al. (2009) and  
446 Buzanskas et al. (2017). The darker the color within the squares the higher the percentage of shared  
447 genes or QTLs.

448 **Figure 3:** Percentage of QTL type (pie plot) and trait related to Reproduction QTLs (barplots) for  
449 the QTL annotation results obtained for Feugang et al. (2009) (A), Buzanskas et al. (2017) (B) and  
450 the combined analysis (using both studies; C).

451 **Figure 4:** Bubble plot displaying the enrichment results for the top 5 enriched QTLs identified  
452 using the QTLs annotated within the candidate regions from Feugang et al. (2009) and Buzanskas  
453 et al. (2017). The darker the red shade in the circles, the more significant the enrichment. The area  
454 of the circles is proportional to the number of QTLs. The x-axis shows a richness factor obtained  
455 by the ratio of the number of QTLs annotated in the candidate regions and the total number of each  
456 QTL (and chromosome in the case of this plot) in the reference database.

457 **Figure 5:** Chord plot showing the relationship between the top 10 enriched QTLs (Scrotal  
458 circumference – SCRCIR, Inhibin level – INHIB, Triglyceride level – TRIGLY, Milk glycosylated  
459 kappa-casein percentage – MGKCASP, Milk iron content – MFE, Milk kappa-casein percentage  
460 - MKCASP) and the studies (Feugang et al. (2009) in purple and Buzanskas et al. (2017) in pink).

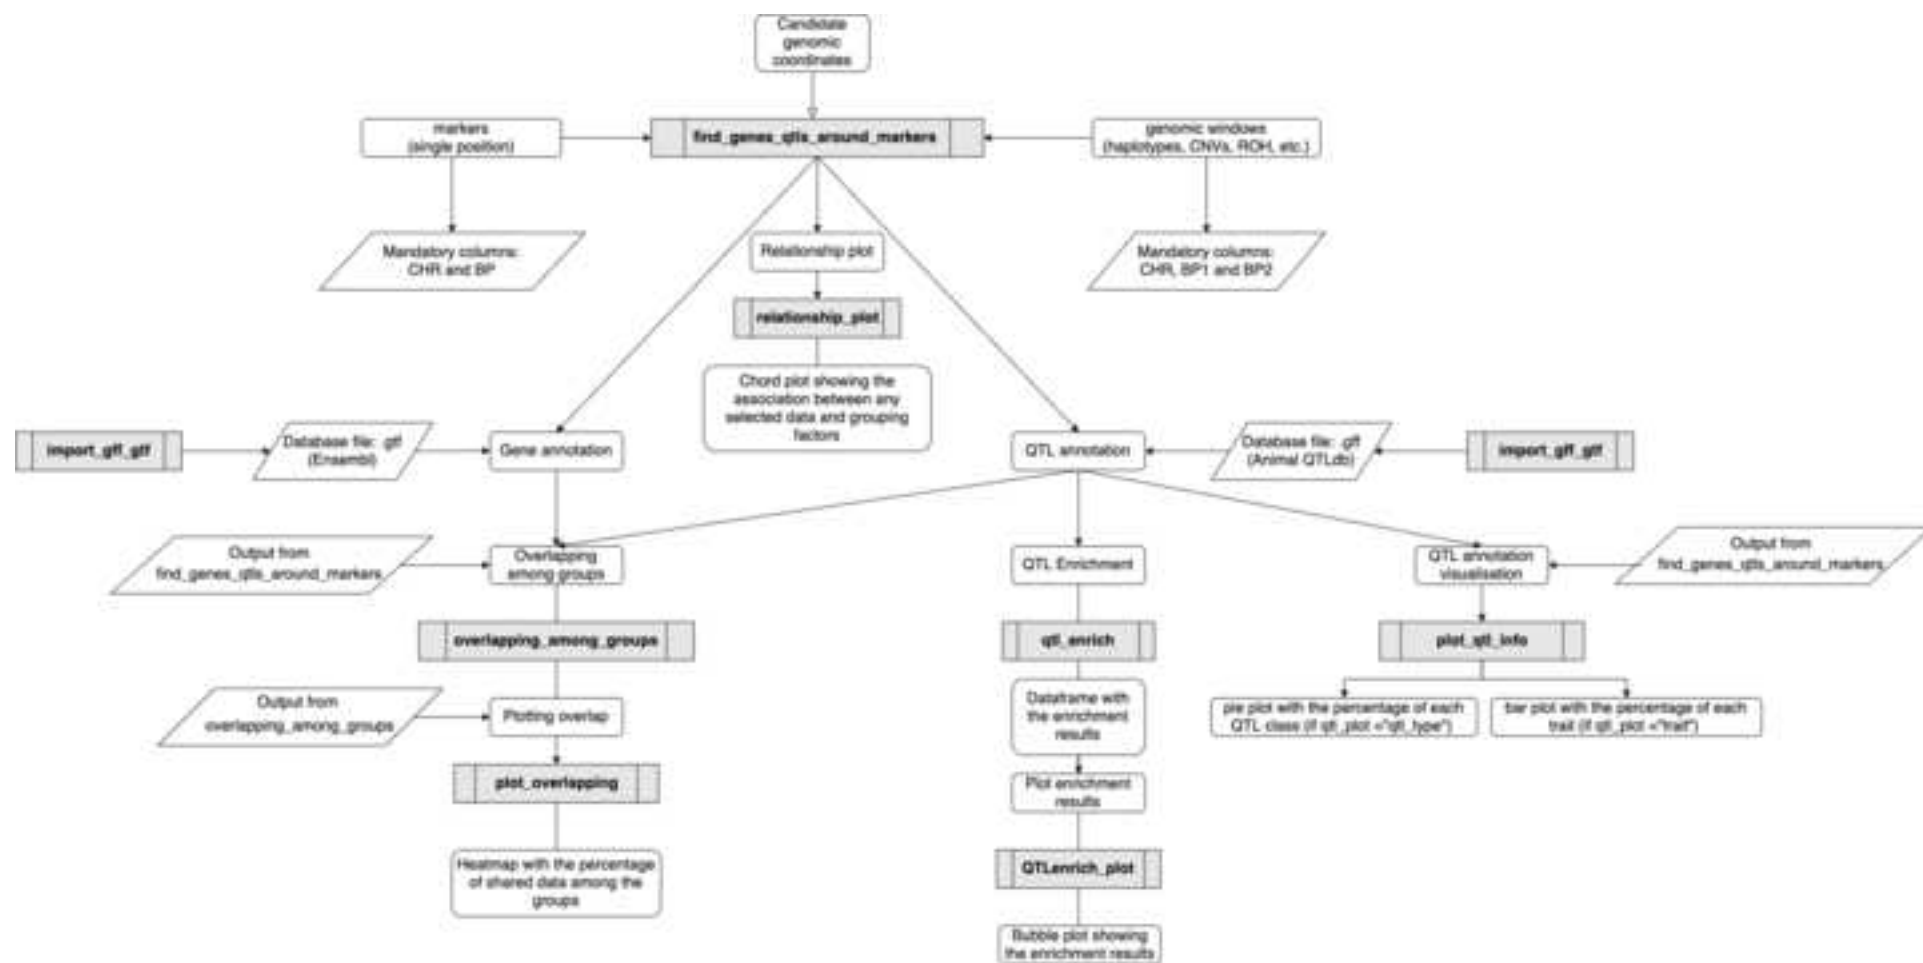

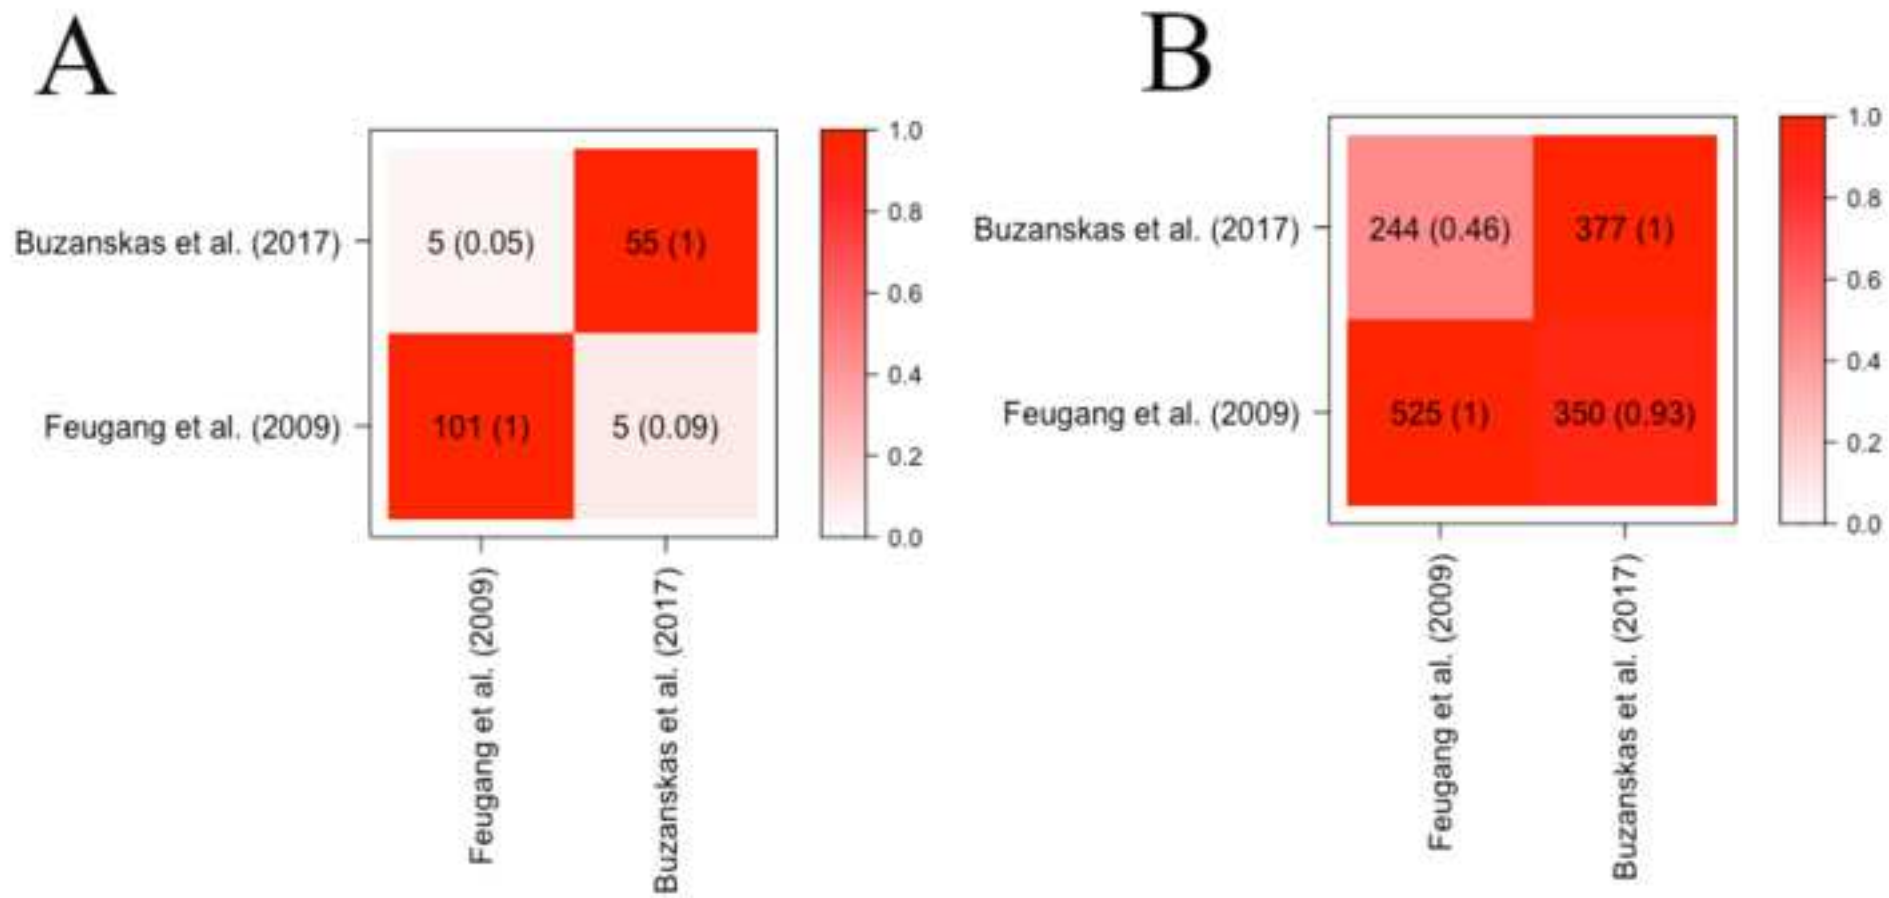

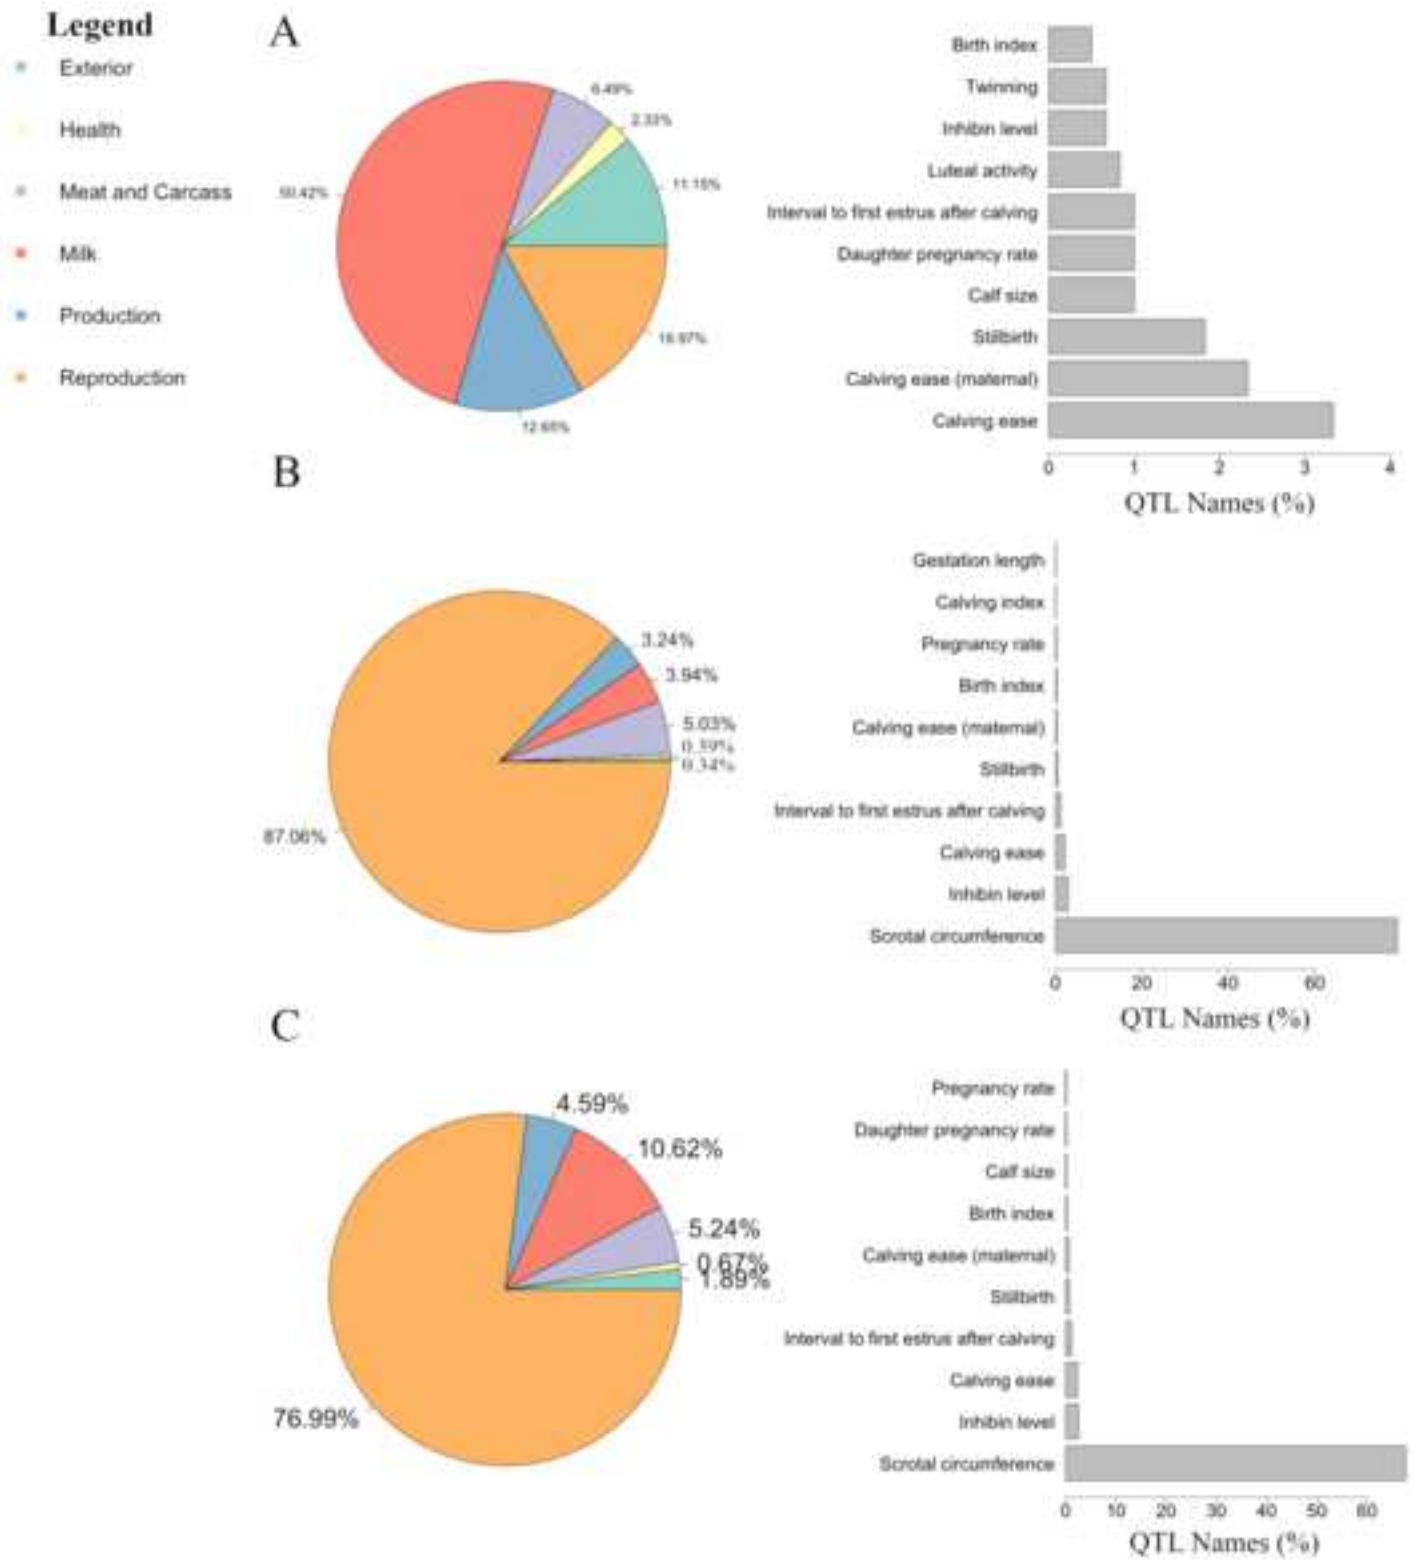

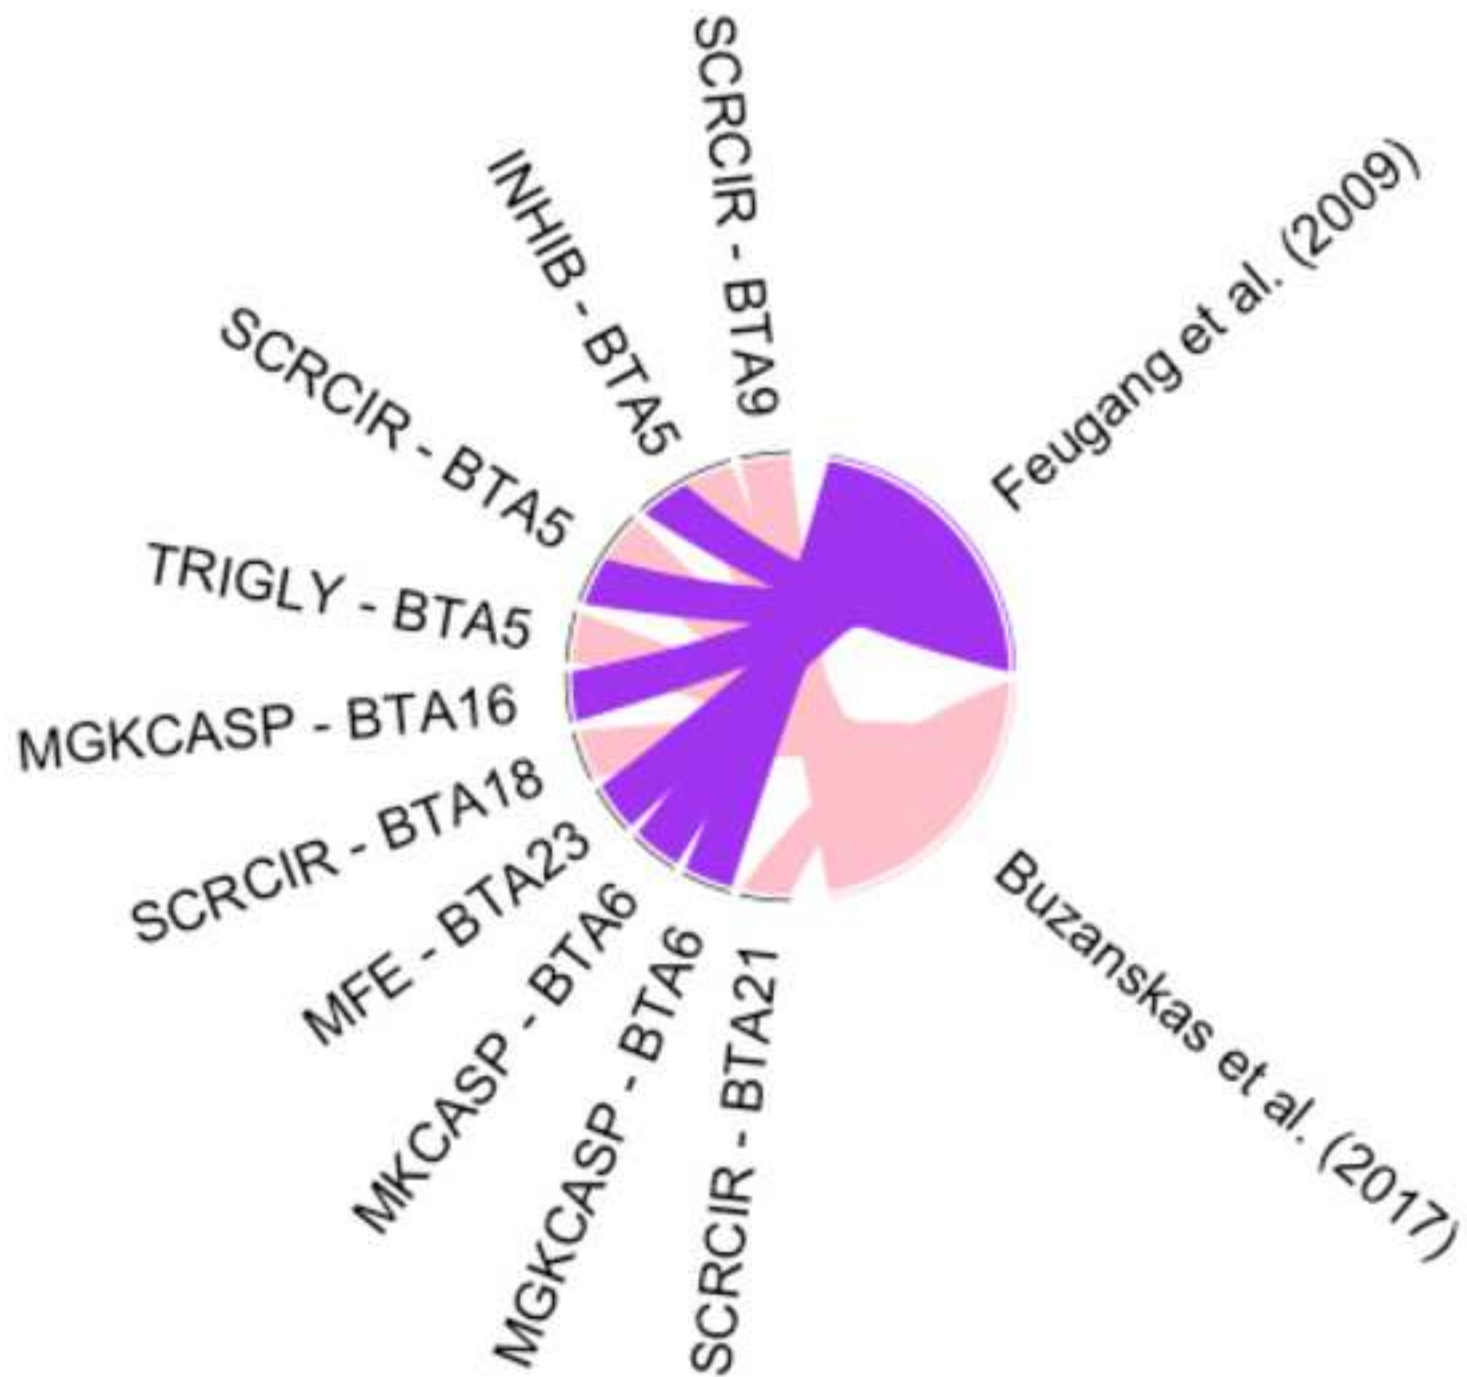

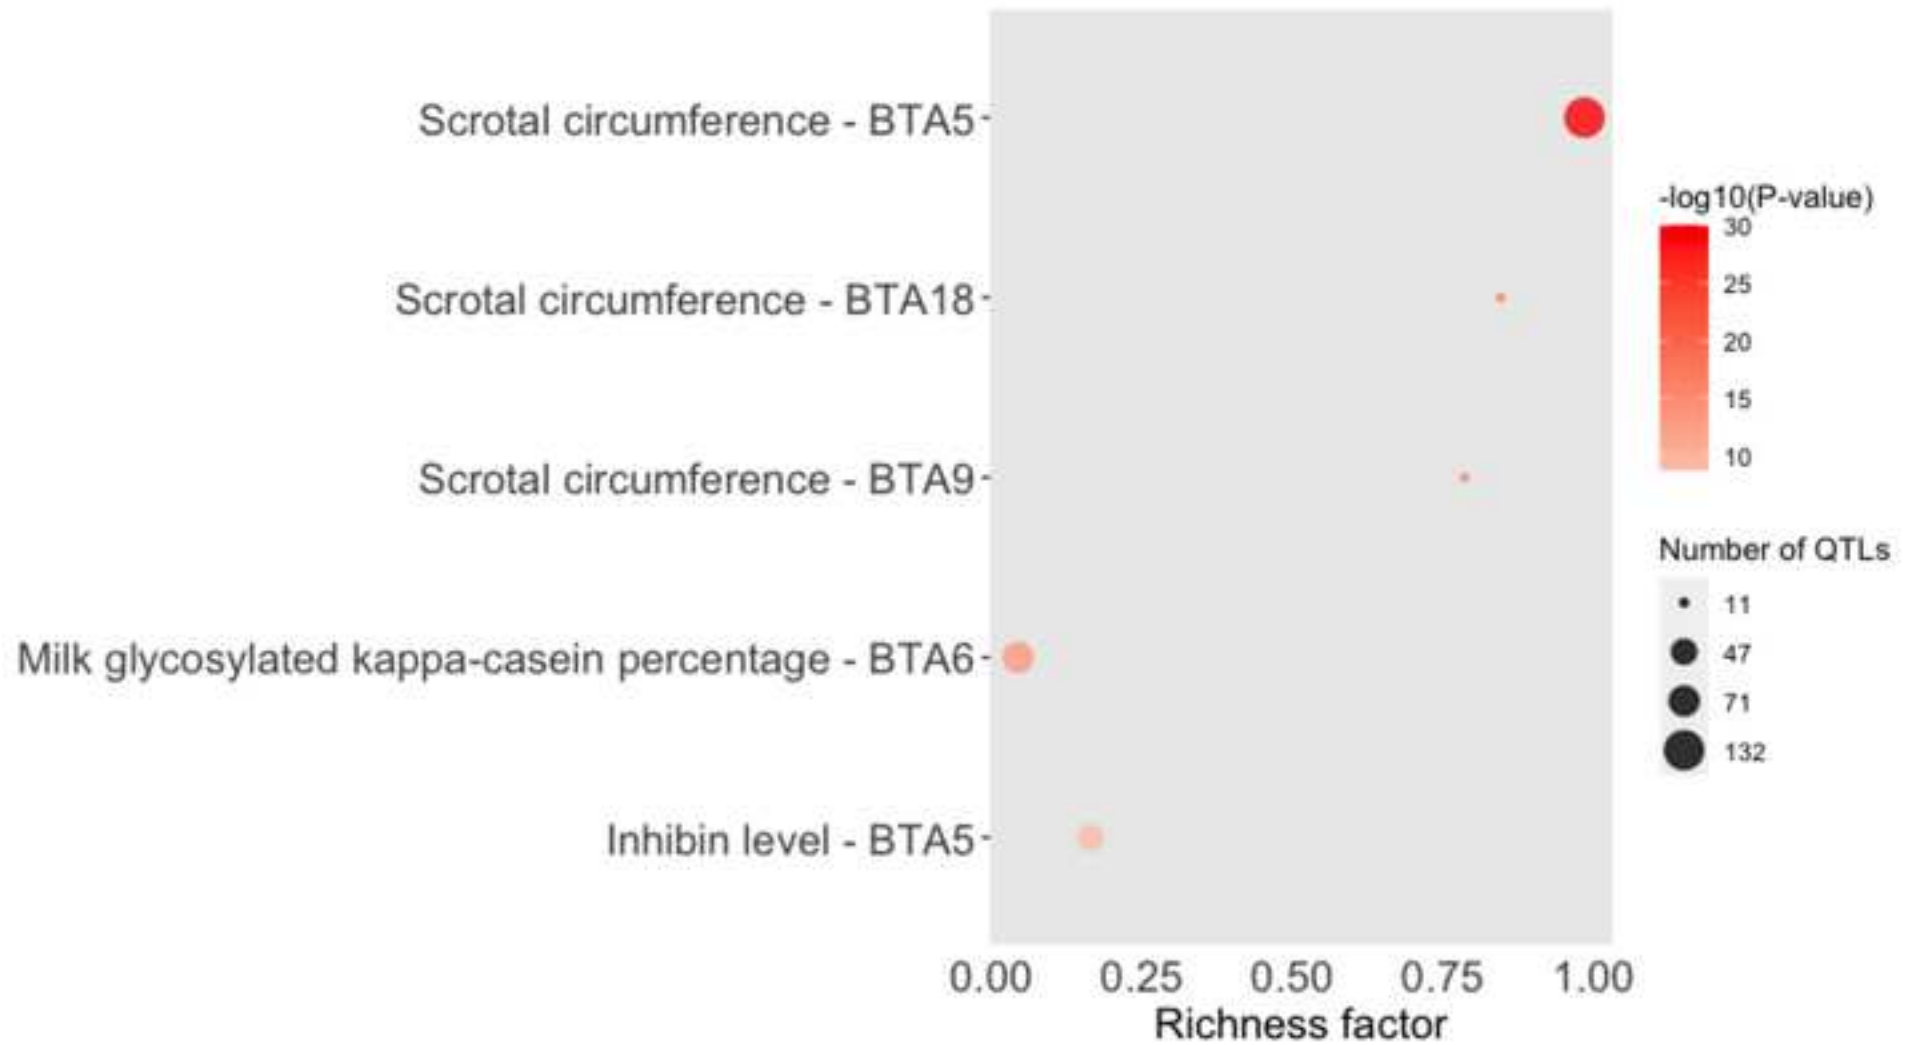





Click here to access/download  
**Supplementary Material**  
Supplementary\_File1.gtf





Click here to access/download  
**Supplementary Material**  
Supplementary\_File2.gff.txt





Click here to access/download  
**Supplementary Material**  
Supplementary\_file3.R



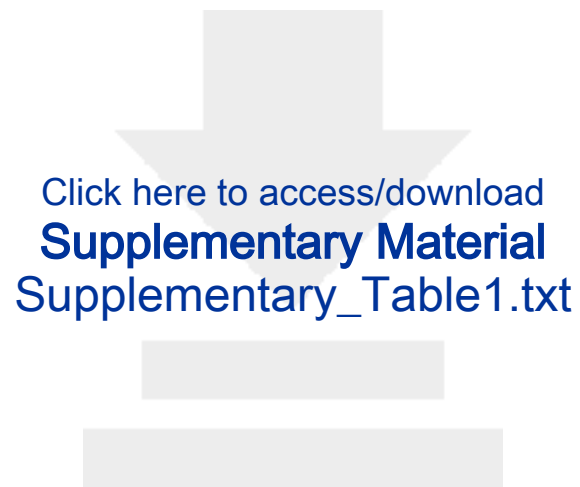

Click here to access/download  
**Supplementary Material**  
Supplementary\_Table1.txt

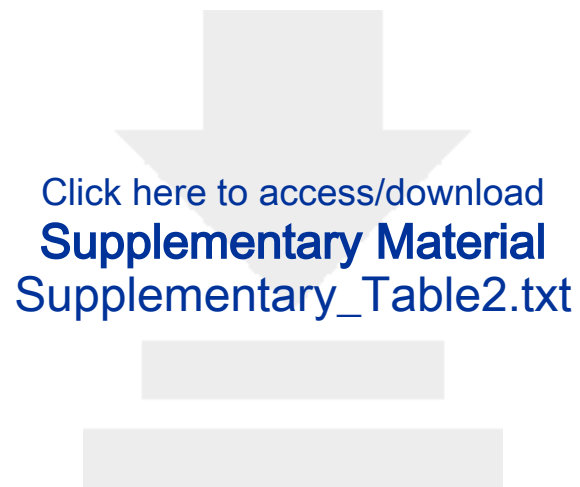

Click here to access/download  
**Supplementary Material**  
Supplementary\_Table2.txt

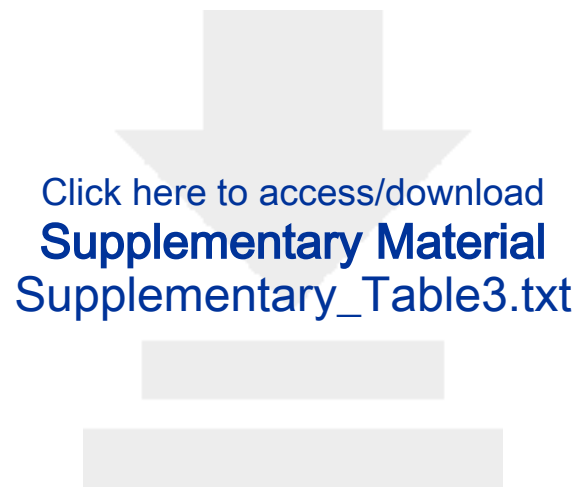

Click here to access/download  
**Supplementary Material**  
Supplementary\_Table3.txt

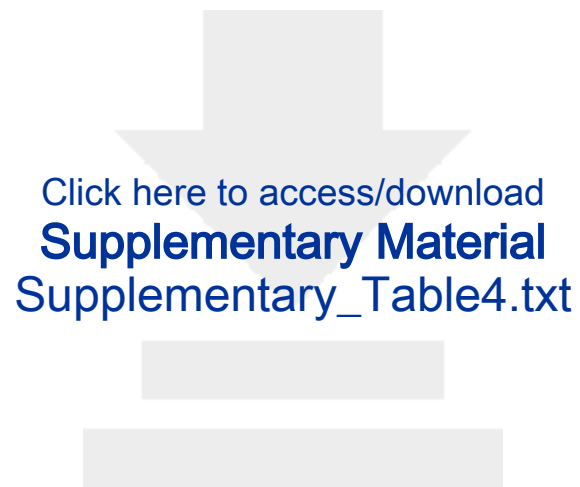

Click here to access/download  
**Supplementary Material**  
Supplementary\_Table4.txt

Guelph, September 1<sup>st</sup>, 2020

Dear Editorial Office,

We are pleased to re-submit the manuscript entitled “GALLO: An R package for Genomic Annotation and integration of multiple data source in livestock for positional candidate LOci” for consideration to publish it in the GigaScience. This is a resubmission of this manuscript after the inclusion of all the suggestion and considerations raised by the editor and the prior publication of the package in an official repository, in this case, the CRAN.

The present study introduces the applicability and the functionalities of GALLO package, developed in the R environment.

The identification of quantitative trait loci (QTLs) is a crucial step in the improvement of genomic selection and economic profitability in livestock. The development of high-throughput sequencing and genotyping methodologies and precision livestock farming allowed the identification of thousands of genomic regions associated with several complex traits. Consequently, the number of QTLs identified across the genome in livestock species increased substantially in the last years. Currently, in the Animal QTLdb it is possible to retrieve information about QTLs previously identified in cattle (127,191), chicken (11,340), horse (2,260), pig (29,865), rainbow trout (584) and sheep (3,001). The proper integration of the results obtained from different methodologies and technologies available is a crucial step for the accurate identification of the biological processes regulating the development of complex traits as well as the identification of potential functional candidate genes. However, currently, the integration of multiple data sources is not very straightforward due to limitations in the pipelines and algorithms implemented in the tools available for livestock. Moreover, although the automatization is possible, the direct link between the candidate regions and/or markers with the annotated genes and QTLs is missed. Consequently, this gap is forcing the user to back solve the overlap between the input and output files in order to perform the proper association between the candidate region and/or markers and the annotated genes and/or positional co-localized QTLs. In addition, nowadays there is still a lack of for customized QTL enrichment analyses in the available software and databases. Genomic Annotation in Livestock for positional candidate LOci (GALLO) is an R package, for the accurate annotation of genes and QTLs located in regions identified using the most common genomic analyses performed in livestock, such as Genome-Wide Association Studies and transcriptomics using RNA-Sequencing. Moreover, GALLO allows the graphical visualization of gene and QTL annotation results, data comparison among different grouping factors (e.g., methods, breeds, tissues, statistical models, studies, etc.), and QTL enrichment in different livestock species including cattle, pigs, sheep, chicken, etc. Consequently, GALLO is a useful package for annotation, identification of hidden patterns across datasets, datamining of previous reported associations, as well as the efficient scrutinization of the genetic architecture of complex traits in livestock.

We affirm that this manuscript has not been published elsewhere and is not under consideration by any other journal. All authors have approved the manuscript and agree with its submission to GigaScience.

The authors declare that they have no competing interests. With my best regards,

**Angela Cánovas, PhD**



Associate Professor Beef Genomics and Small Ruminants  
University of Guelph  
Department of Animal Biosciences  
Centre for Genetics and Improvement of Livestock  
Telephone: (519) 824-4129 ext. 56295  
email: [acanovas@uoguelph.ca](mailto:acanovas@uoguelph.ca)
